1           **Dopamine release in nucleus accumbens is under tonic inhibition by adenosine A<sub>1</sub> receptors**  
2                           **regulated by astrocytic ENT1 and dysregulated by ethanol**

3  
4           Bradley M. Roberts<sup>1,2</sup>, Elizabeth Lambert<sup>1</sup>, Jessica A. Livesey<sup>1</sup>, Zhaofa Wu<sup>3</sup>, Yulong Li<sup>3</sup> & Stephanie J. Cragg<sup>1,2</sup>

5  
6           <sup>1</sup> Centre for Integrative Neuroscience, Department of Physiology, Anatomy and Genetics, University of Oxford,  
7           Oxford OX1 3PT, United Kingdom

8           <sup>2</sup> Oxford Parkinson's Disease Centre, University of Oxford, Oxford OX1 3PT, United Kingdom

9           <sup>3</sup> State Key Laboratory of Membrane Biology, Peking University School of Life Sciences, Beijing, China

10  
11  
12           Corresponding authors: Professor Stephanie Cragg  
13                                           Email: [Stephanie.Cragg@dpag.ox.ac.uk](mailto:Stephanie.Cragg@dpag.ox.ac.uk)  
14                                           Dr Bradley Roberts  
15                                           Email: [Bradley.Roberts@dpag.ox.ac.uk](mailto:Bradley.Roberts@dpag.ox.ac.uk)

16  
17  
18           Abbreviated title: Tonic A<sub>1</sub>R-inhibition of NAcC dopamine release

19           Manuscript length: Abstract (250 words), Significance Statement (119 words), Introduction (638 words), and  
20           Discussion (1,636 words); Main Figures (6); Tables (1)

21           Author contributions: B.M.R. and S.J.C. conceived and designed the research, and wrote the manuscript with  
22           input from all other authors; B.M.R. and E.L. assisted in the collection, analysis and interpretation of  
23           voltammetry data; B.M.R. and J.A.L. assisted in the collection, analysis and interpretation of adenosine GRAB  
24           imaging data; Y.L. and Z.W. conceived of, designed, and provided Adenosine GRAB construct.

25           Acknowledgements: This work was supported by grants from the UK Medical Research Council  
26           (MR/V013599/1 to S.J.C. and B.M.R.) and the University of Oxford John Fell Fund (0008310 to B.M.R.), a Junior  
27           Research Fellowship to B.M.R. from St John's College, Oxford, and a BBSRC Doctoral Training Grant to J.A.L.

28           Conflict of interest: The authors declare no competing financial interests associated with this study.  
29  
30  
31  
32  
33  
34  
35

36 **ABSTRACT** (250 words)

37 Striatal adenosine A<sub>1</sub> receptor (A<sub>1</sub>R) activation can inhibit dopamine release. A<sub>1</sub>Rs on other striatal neurons are  
38 activated by an adenosine tone that is limited by equilibrative nucleoside transporter 1 (ENT1) that is enriched  
39 on astrocytes and is ethanol-sensitive. We explored whether dopamine release in nucleus accumbens core is  
40 under tonic inhibition by A<sub>1</sub>Rs, and is regulated by astrocytic ENT1 and ethanol. In *ex vivo* striatal slices from  
41 male and female mice, A<sub>1</sub>R agonists inhibited dopamine release evoked electrically or optogenetically and  
42 detected using fast-scan cyclic voltammetry, most strongly for lower stimulation frequencies and pulse  
43 numbers, thereby enhancing the activity-dependent contrast of dopamine release. Conversely, A<sub>1</sub>R  
44 antagonists reduced activity-dependent contrast but enhanced evoked dopamine release levels, even for  
45 single optogenetic pulses indicating an underlying tonic inhibition. The ENT1 inhibitor NBTI reduced dopamine  
46 release and promoted A<sub>1</sub>R-mediated inhibition, and conversely, virally-mediated astrocytic overexpression of  
47 ENT1 enhanced dopamine release and relieved A<sub>1</sub>R-mediated inhibition. By imaging the genetically encoded  
48 fluorescent adenosine sensor GRAB-Ado, we identified a striatal extracellular adenosine tone that was  
49 elevated by the ENT1 inhibitor and sensitive to gliotoxin fluorocitrate. Finally, we identified that ethanol (50  
50 mM) promoted A<sub>1</sub>R-mediated inhibition of dopamine release, through diminishing adenosine uptake via ENT1.  
51 Together, these data reveal that dopamine output dynamics are gated by a striatal adenosine tone, limiting  
52 amplitude but promoting contrast, regulated by ENT1, and promoted by ethanol. These data add to the  
53 diverse mechanisms through which ethanol modulates striatal dopamine, and to emerging datasets supporting  
54 astrocytic transporters as important regulators of striatal function.

55

56 **SIGNIFICANCE STATEMENT** (119 words)

57 Dopamine axons in the mammalian striatum are emerging as strategic sites where neuromodulators can  
58 powerfully influence dopamine output in health and disease. We found that ambient levels of the  
59 neuromodulator adenosine tonically inhibit dopamine release in nucleus accumbens core via adenosine A<sub>1</sub>  
60 receptors (A<sub>1</sub>Rs), to a variable level that promotes the contrast in dopamine signals released by different  
61 frequencies of activity. We reveal that the equilibrative nucleoside transporter 1 (ENT1) on astrocytes limits  
62 this tonic inhibition, and that ethanol promotes it by diminishing adenosine uptake via ENT1. These findings  
63 support the hypotheses that A<sub>1</sub>Rs on dopamine axons inhibit DA release and, furthermore, that astrocytes  
64 perform important roles in setting the level of striatal dopamine output, in health and disease.

65

66

67

68 **INTRODUCTION** (638 words)

69 Striatal dopamine (DA) axons are major strategic sites for striatal neuromodulators to influence DA output  
70 (Nolan *et al.*, 2020; Rice *et al.*, 2011; Roberts *et al.*, 2021; Sulzer *et al.*, 2016). Adenosine acts at A<sub>1</sub>- and A<sub>2A</sub>-  
71 receptors on diverse neurons in striatum, and exogenous activation of striatal A<sub>1</sub>-receptors (A<sub>1</sub>Rs) but not A<sub>2</sub>-  
72 receptors inhibits evoked DA release (Okada *et al.*, 1996; O’Neill *et al.*, 2007; O’Connor and O’Neill, 2008; Ross  
73 and Venton, 2015). Immunocytochemical studies of rat synaptosomes suggest that A<sub>1</sub>Rs can be localised  
74 directly to striatal DA axons (Borycz *et al.*, 2007), but definitive evidence is lacking and other intermediary  
75 inputs to DA axons have not been excluded. In nucleus accumbens core (NAcC), adenosine can provide tonic  
76 A<sub>1</sub>R-mediated inhibition of glutamatergic and GABAergic transmission (Brundege and Williams, 2002; Adhikary  
77 and Birdsong, 2021). DA release in NAcC and caudate-putamen has been suggested to be under tonic A<sub>1</sub>R-  
78 mediated inhibition, as A<sub>1</sub>R antagonists increase extracellular DA levels in rats *in vivo* measured by  
79 microdialysis (Okada *et al.*, 1996; Solinas *et al.*, 2002; Quarta *et al.*, 2004a, 2004b; Borycz *et al.*, 2007), but  
80 whether these effects were direct and local, or involved intact long-loop circuits was not resolved.  
81 Furthermore, adenosine acts in a frequency-dependent manner on glutamate and GABA transmission across  
82 other nuclei, resulting in a stronger A<sub>1</sub>R-dependent inhibition of neurotransmission elicited by low-frequency  
83 versus high-frequency electrical stimulations (e.g. neocortex: Perrier *et al.*, 2019; Qi *et al.*, 2017; Yang *et al.*,  
84 2007; hippocampus: Moore *et al.*, 2003; calyx of Held: Wong *et al.*, 2006). It has not yet been established  
85 whether striatal A<sub>1</sub>Rs simply inhibit DA neurotransmission, or might also promote contrast in DA signals  
86 released by different firing rates, and whether in turn this is independent from striatal acetylcholine or GABA  
87 circuits which modify DA signal contrast (Rice and Cragg, 2004; Lopes *et al.*, 2019).

88 Extracellular adenosine concentrations are limited by the activity of nucleoside transporters, most notably the  
89 equilibrative nucleoside transporter type 1 (ENT1) (Young *et al.*, 2008; Nguyen *et al.*, 2015). ENT1 is expressed  
90 in striatum (Jennings *et al.*, 2001; Anderson *et al.*, 2002) and is especially abundant on astrocytes (Peng *et al.*,  
91 2005; Chai *et al.*, 2017). ENT1 on astrocytes can regulate adenosine signalling in striatum and elsewhere (Nagai  
92 *et al.*, 2005; Tanaka *et al.*, 2011; Boddum *et al.*, 2016; Cheffer *et al.*, 2018; Hong *et al.*, 2020), and in dorsal  
93 striatum, astrocytic ENT1 activity modulates reward-seeking behaviours (Hong *et al.*, 2020; Kang *et al.*, 2020).  
94 We recently identified that astrocytes regulate DA release, owing to their expression of GABA transporters  
95 that regulate tonic GABAergic inhibition (Roberts *et al.*, 2020), but whether ENT1 on astrocytes also modulates  
96 DA output by regulating adenosine tone at A<sub>1</sub>Rs has not been explored. Additionally, adenosine uptake by  
97 ENT1 is impaired by acute ethanol, which augments extracellular adenosine levels (Nagy *et al.*, 1989, 1990;  
98 Choi *et al.*, 2004) and contributes to the ataxic and hypnotic effects of ethanol through activation of striatal  
99 A<sub>1</sub>Rs (Meng and Dar, 1995; Phan *et al.*, 1997; Dar, 2001). Acute ethanol reduces DA release evoked in NAcC in  
100 brain slices (Yorgason *et al.*, 2014, 2015), as does chronic intermittent ethanol exposure in mice (Karkhanis *et al.*,  
101 2015; Rose *et al.*, 2016), raising the question of whether ethanol regulates DA by promoting A<sub>1</sub>R-mediated  
102 inhibition of DA release.

103 Here, we assessed A<sub>1</sub>R regulation of DA release in NAcC by detecting DA in real-time using fast-scan cyclic  
104 voltammetry and detecting striatal adenosine using the genetically encoded fluorescent adenosine sensor  
105 (GRAB-Ado) (Peng et al., 2020; Wu et al., 2020). We reveal that A<sub>1</sub>Rs can tonically inhibit DA output through an  
106 ambient adenosine tone, and that A<sub>1</sub>Rs additionally regulate the activity-sensitivity of DA release,  
107 independently from striatal acetylcholine or GABA inputs. Furthermore, we find that tonic A<sub>1</sub>R-mediated  
108 inhibition of DA release is regulated by adenosine uptake by ENT1 on astrocytes, and dysregulated by ethanol.

109

## 110 MATERIALS & METHODS

### 111 Animals

112 All procedures were performed in accordance with the Animals in Scientific Procedures Act 1986 (Amended  
113 2012) with ethical approval from the University of Oxford, and under authority of a Project Licence granted by  
114 the UK Home Office. Experiments were carried out using male and female adult (6–12 week-old) C57BL/6J  
115 mice (Charles River) or heterozygote knock-in mice bearing an internal ribosome entry site (IRES)-linked Cre  
116 recombinase gene downstream of the gene *Slc6a3*, which encodes the plasma membrane DA transporter  
117 (*Slc6a3*<sup>IRES-Cre</sup> mice; *B6.SJL-Slc6a3*<sup>tm1.1(cre)Bkmm</sup>/J; Jackson Laboratories stock no. 006660) maintained on a  
118 C57BL/6J background. All mice were group-housed and maintained on a 12-hr light cycle (light ON from 07:00  
119 – 19:00) with *ad libitum* access to food and water. Data from male and female mice were combined  
120 throughout as no differences in the effects of adenosine A<sub>1</sub> receptor agonists or antagonists between sexes  
121 were observed (**Table 1**).

### 122 Stereotaxic intracranial injections

123 Mice were anesthetized with isoflurane and placed in a small animal stereotaxic frame (David Kopf  
124 Instruments). After exposing the skull under aseptic techniques, a small burr hole was drilled and adeno-  
125 associated viral solutions were injected at an infusion rate of 100 nL/min with a 32-gauge Hamilton syringe  
126 (Hamilton Company) using a microsyringe pump (World Precision Instruments) and withdrawn 5 min after the  
127 end of injection. To virally express ChR2 selectively in DA neurons, 600 nL per hemisphere of AAV5-EF1α-DIO-  
128 hChR2(H134R)-eYFP (8 × 10<sup>12</sup> genome copies per ml; UNC Vector Core Facility) encoding Cre-dependent ChR2  
129 was injected bilaterally into the midbrain (AP -3.1 mm, ML ± 1.2 mm from bregma, DV -4.25 mm from exposed  
130 dura mater) of 6 week-old *Slc6a3*<sup>IRES-Cre</sup> mice, following previously described methods (Roberts et al., 2020). To  
131 overexpress ENT1 in striatal astrocytes, 600 nL per hemisphere of AAV5-GfaABC<sub>1</sub>D-mENT1/mCherry-WPRE (1.6  
132 × 10<sup>13</sup> genome copies per ml; Vector Biolabs) encoding a fluorescence protein-fused and functional ENT1 under  
133 the astrocyte-specific abbreviated glial fibrillary acidic protein promoter (*GfaABC<sub>1</sub>D*) (Hong et al., 2020; Jia et  
134 al., 2020) or AAV5-GfaABC<sub>1</sub>D-mCherry-WPRE (6.1 × 10<sup>12</sup> genome copies per ml; ETH Zurich Viral Vector Facility)  
135 for control fluorophore expression, was injected bilaterally into nucleus accumbens (AP +1.3 mm, ML ± 1.2 mm  
136 from bregma, DV -3.75 mm from exposed dura mater) of 6 week-old C57BL/6J wild-type mice. To virally  
137 express the fluorescent adenosine reporter GRAB-Ado (Peng et al., 2020; Wu et al., 2020), 800 nL per  
138 hemisphere of AAV9-hSyn-GRAB-Ado1.0m (0.5 × 10<sup>13</sup> genome copies per ml; WZ Biosciences) was injected

139 bilaterally into nucleus accumbens or dorsal striatum (AP +0.8 mm, ML  $\pm$  1.75 mm from bregma, DV -2.40 mm  
140 from exposed dura mater) of 6 week-old C57BL/6J wild-type mice. Mice were used for experiments 2–4 weeks  
141 post-intracranial injection.

#### 142 Brain slice preparation

143 Acute brain slices were obtained from 8 – 12-week-old mice using standard techniques. Mice were culled by  
144 cervical dislocation within 1 – 2 hrs after start of light ON period of light cycle and brains were dissected out  
145 and submerged in ice-cold cutting solution containing (in mM): 194 sucrose, 30 NaCl, 4.5 KCl, 1 MgCl<sub>2</sub>, 26  
146 NaHCO<sub>3</sub>, 1.2 NaH<sub>2</sub>PO<sub>4</sub>, and 10 D-glucose. Coronal slices 300  $\mu$ m-thick containing striatum were prepared from  
147 dissected brain tissue using a vibratome (VT1200S, Leica Microsystems) and transferred to a holding chamber  
148 containing artificial cerebrospinal fluid (aCSF) containing (in mM): 130 NaCl, 2.5 KCl, 26 NaHCO<sub>3</sub>, 2.5 CaCl<sub>2</sub>, 2  
149 MgCl<sub>2</sub>, 1.25 NaH<sub>2</sub>PO<sub>4</sub> and 10 glucose. Sections were incubated at 34 °C for 15 min before they were stored at  
150 room temperature (20–22 °C) until recordings were performed. All recordings were obtained within 8 h of  
151 slicing. All solutions were saturated with 95% O<sub>2</sub>/5% CO<sub>2</sub>. Before recording, individual slices were hemisected  
152 and transferred to a recording chamber and superfused at ~2.5–3.0 mL/min with aCSF at 31–33 °C.

#### 153 Fast-scan cyclic voltammetry (FSCV)

154 Evoked extracellular DA concentration ([DA]<sub>o</sub>) was measured in acute coronal brain slices using FSCV at  
155 carbon-fibre microelectrodes (7–10  $\mu$ m diameter) fabricated in-house (tip length 70–120  $\mu$ m) as used  
156 previously (Roberts et al., 2020). In brief, a triangular voltage waveform was scanned across the  
157 microelectrode (-700 to +1300 mV vs Ag/AgCl reference) at 800 V/s and at a scan frequency of 8 Hz using a  
158 Millar Voltammeter (Julian Millar, Barts and the London School of Medicine and Dentistry). Microelectrodes  
159 were calibrated post-hoc in 2  $\mu$ M DA in each experimental solution. Microelectrode sensitivity to DA was  
160 between 10 and 40 nA/ $\mu$ M. Signals were attributed to DA due to the potentials of their characteristic oxidation  
161 (500-600 mV) and reduction (-200 mV) peaks. Currents at the oxidation peak potential were measured from  
162 the baseline of each voltammogram and plotted against time to provide profiles of [DA]<sub>o</sub> versus time.  
163 Recordings were carried out in the nucleus accumbens core (NAcC), within ~100  $\mu$ m of the anterior  
164 commissure, one site per slice. Electrical or light stimuli were delivered at 2.5 min intervals, which allow stable  
165 DA release to be sustained at ~90–95% of original levels over the typical time course of experiments, in control  
166 conditions (Roberts et al., 2020). In experiments where [DA]<sub>o</sub> was evoked by electrical stimulation, a local  
167 bipolar concentric Pt/Ir electrode (25  $\mu$ m inner diameter, 125  $\mu$ m outer diameter; FHC Inc.) was placed  
168 ~100  $\mu$ m from the recording microelectrode and stimulus pulses (200  $\mu$ s duration) were given at 0.6 mA. We  
169 applied either single pulses (1p) or trains of 2–20 pulses at 10–100 Hz. In experiments where [DA]<sub>o</sub> was evoked  
170 by light stimulation in slices prepared from *Slc6a3*<sup>RES-Cre</sup> mice expressing ChR2, DA axons in striatum were  
171 activated by TTL-driven (Multi Channel Stimulus II, Multi Channel Systems) brief pulses (2 ms) of blue light (470  
172 nm; 5 mWmm<sup>-2</sup>; OptoLED, Cairn Research), which illuminated the field of view (2.2 mm diameter,  $\times$ 10 water-  
173 immersion objective). Data were digitized at 50 kHz using a Digidata 1550A digitizer (Molecular Devices). Data  
174 were acquired and analysed using Axoscope 11.0 (Molecular Devices) and locally written VBA scripts in  
175 Microsoft Excel (2013).

176 GRAB-Ado Imaging

177 An Olympus BX51WI microscope equipped with a 470 nm OptoLED light system (Cairn Research), Iris 9  
178 Scientific CMOS camera (Teledyne Photometrics), 525/50 nm emission filter (Cairn Research), and x10/0.3 NA  
179 water-immersion objective (Olympus) was used for wide-field fluorescence imaging of GRAB-Ado in striatal  
180 slices. Images acquisition was controlled using Micro-Manager 1.4. Electrical stimulations, LED light, and image  
181 acquisition were synchronised using TTL-driven stimuli via Multi Channel Stimulus II (Multi Channel Systems).  
182 Image files were analysed with Matlab R2017b and Fiji 1.5. For experiments measuring changes to basal, non-  
183 stimulated extracellular adenosine levels, images (100 ms exposure duration) were acquired every 30 s during  
184 brief exposure (1 s) to blue light (470 nm; 1 mWmm<sup>-2</sup>; OptoLED, Cairn Research) for a 40 min window. We  
185 extracted fluorescence intensity from the region of interest (ROI; 150 x 150 μm) and derived a background-  
186 subtracted fluorescence intensity ( $F_t$ ) by subtracting background fluorescence intensity from an equal-sized  
187 ROI where there was no GRAB-Ado expression (i.e. cortex). Data are expressed as a change in fluorescence  
188 ( $\Delta F/F_0$ ) and were derived by calculating  $[(F_t - F_0)/F_0]$ , where  $F_0$  is the average background-subtracted  
189 fluorescence intensity ( $F_t$ ) of the first 20 acquired images (initial 10 mins). For experiments measuring  
190 extracellular adenosine levels in response to trains of electrical stimulation or experiments calibrating GRAB-  
191 Ado signals to applications of known concentrations of exogenous adenosine, images were acquired at 10 Hz  
192 (100 ms exposure duration) during continuous blue light (470 nm; 1 mWmm<sup>-2</sup>; OptoLED, Cairn Research) for a  
193 4 min recording window. For evoked adenosine release, electrical stimulus pulses (100 pulses at 50 Hz, 200 μs  
194 pulse duration, 0.6 mA) were given by a local bipolar concentric Pt/Ir electrode (25 μm inner diameter, 125 μm  
195 outer diameter; FHC Inc.) at the 30 second timepoint. Bath applications of exogenous adenosine were also  
196 applied at the 30 second timepoint. Background-subtracted fluorescence intensity ( $F_t$ ) was extracted from an  
197 ROI (150 x 150 μm) ~50 μm from the stimulating electrode and  $\Delta F/F_0$  was derived by calculating  $[(F_t - F_0)/F_0]$ ,  
198 where  $F_0$  is the average fluorescence intensity over the 10 s window (100 images) prior to onset of electrical  
199 stimulation or bath application of exogenous adenosine.

200 Drugs

201 Adenosine (Ado, 25-100 μM), (+)-bicuculline (10 μM), dihydro-β-erythroidine hydrobromide (DHβE, 1 μM),  
202 nitrobenzylthioinosine (NBTI, 10 μM), and tetrodotoxin (TTX, 1 μM) were obtained from Tocris Bioscience. CGP  
203 55845 hydrochloride (CGP, 4 μM), 8-Cyclopentyl-1,3-dimethylxanthine (CPT, 10 μM), and  
204 dipropylcyclopentylxanthine (DPCPX, 2 μM) were obtained from Abcam. Ethanol (EtOH, 50 mM), and N<sup>6</sup>-  
205 cyclopentyladenosine (CPA, 15 μM) were obtained from Sigma-Aldrich. Fluorocitrate (FC) was prepared as  
206 previously described (Paulsen et al., 1987; Roberts et al., 2020). In brief, D,L-fluorocitric acid Ba<sub>3</sub> salt (Sigma-  
207 Aldrich) was dissolved in 0.1 M HCl, the Ba<sup>2+</sup> precipitated with 0.1 M Na<sub>2</sub>SO<sub>4</sub> and then centrifuged at 1000 × g  
208 for 5 min. Supernatant containing fluorocitrate was used at a final concentration of 100 μM for  
209 experimentation.

210 Immunocytochemistry

211 To confirm viral ENT1-mCherry expression in non-neuronal cells, direct mCherry fluorophore expression was  
212 compared to indirect immunofluorescence for neuronal marker NeuN. ENT1-mCherry expressing mice were

213 anaesthetised with an overdose of pentobarbital and transcardially perfused with phosphate-buffered saline  
214 (PBS), followed by 4% paraformaldehyde in 0.1 M phosphate buffer, pH 7.4. Brains were removed and post-  
215 fixed overnight in 4% PFA. Coronal sections were cut using a vibrating microtome (Leica VT1000S) at a  
216 thickness of 50  $\mu\text{m}$  and collected in a 1 in 4 series. Sections were stored in PBS with 0.05% sodium azide until  
217 processing. Upon processing, sections were washed in PBS and then blocked for 1 h in a solution of PBS TritonX  
218 (0.3%; PBS-Tx) containing 10% normal donkey serum (NDS). Sections were then incubated in primary  
219 antibodies overnight in PBS-Tx with 2% NDS at 4 °C. Primary antibodies: rabbit anti-NeuN (1:500, Biosensis, R-  
220 3770–100). Sections were then incubated in species-appropriate fluorescent secondary antibodies with  
221 minimal cross-reactivity for 2 hours in PBS-Tx with 2% NDS at room temperature. Secondary antibodies:  
222 Donkey anti-rabbit AlexaFluor 405 (1:500, Abcam, ab175651). Sections were washed in PBS and then mounted  
223 on glass slides and cover-slipped using Vectashield (Vector Labs). Coverslips were sealed using nail varnish and  
224 stored at 4 °C. Confocal images were acquired with an Olympus FV3000 Confocal Laser Scanning Microscope  
225 using a x20 and x40 objective and filters for appropriate excitation and emission wave lengths (Olympus  
226 Medical).

227

## 228 RESULTS

### 229 Adenosine A<sub>1</sub>Rs inhibit striatal DA release

230 Previous studies have shown that agonists for striatal A<sub>1</sub>Rs inhibit DA release evoked by discrete electrical  
231 stimulations in dorsal and ventral striatum (O'Neill et al., 2007; O'Connor and O'Neill, 2008; Ross and Venton,  
232 2015). We firstly corroborated these observations in NAcC for DA release evoked by single stimulus pulses and  
233 detected using FSCV in *ex vivo* coronal slices (**Figure 1A**). Bath application of A<sub>1</sub>R agonist CPA (15  $\mu\text{M}$ ) reduced  
234 evoked [DA]<sub>o</sub> by ~50% (**Figure 1B**,  $t_{(5)} = 15.2$ ,  $p < 0.0001$ , paired t test). This effect of CPA was prevented by  
235 prior application of A<sub>1</sub>R antagonist DPCPX (2  $\mu\text{M}$ ) (**Figure 1B**,  $F_{(1, 11)} = 88.6$ ,  $p < 0.0001$ , two-way RM ANOVA for  
236 effect of CPA in the absence vs presence of DPCPX; **Figure 1E**,  $t_{(11)} = 9.99$ ,  $p < 0.0001$ , unpaired t test),  
237 confirming an action via A<sub>1</sub>Rs.

238 Striatal cholinergic interneurons (ChIs) have A<sub>1</sub>Rs (Alexander and Reddington, 1989; Ferré et al., 1996; Song et  
239 al., 2000; Preston et al., 2009) through which A<sub>1</sub>R agonists can hyperpolarise ChIs and inhibit ACh release  
240 (Richardson and Brown, 1987; Brown et al., 1990; Preston et al., 2009). Because ChIs operate strong control  
241 over DA release via nAChRs (Jones et al., 2001; Rice and Cragg, 2004; Zhang and Sulzer, 2004), and can mediate  
242 the effects of other striatal neuromodulators on DA (Britt and McGehee, 2008; Hartung et al., 2011; Stouffer et  
243 al., 2015; Kosillo et al., 2016; Lemos et al., 2019), they might indirectly mediate the control of DA by A<sub>1</sub>Rs. We  
244 explored whether A<sub>1</sub>Rs can modulate striatal DA release in the absence of these potential actions on ChIs and  
245 nAChRs. We used nAChR antagonist DH $\beta$ E (1  $\mu\text{M}$ ) to inhibit nAChRs as described previously (Rice and Cragg,  
246 2004; Threlfell et al., 2012), after which subsequent application of CPA nonetheless reduced evoked [DA]<sub>o</sub>,  
247 evoked by single stimulus pulses by ~50% (**Figure 1C**,  $t_{(4)} = 15.9$ ,  $p < 0.0001$ , paired t test), an effect not  
248 different from that seen in the absence of DH $\beta$ E (**Figure 1C**,  $F_{(1, 9)} = 1.22$ ,  $p = 0.29$ , two-way RM ANOVA: main

249 effect of drug; **Figure 1E**,  $t_{(9)} = 1.21$ ,  $p = 0.259$ , unpaired t test), indicating that A<sub>1</sub>Rs can suppress DA release  
250 independently from any indirect effects via Chl inputs to nAChRs.

251 DA release throughout striatum is also under tonic inhibition by GABA through action at GABA<sub>A</sub> and GABA<sub>B</sub>  
252 receptors (Lopes et al., 2019; Roberts et al., 2020), and we tested whether A<sub>1</sub>Rs require this GABA input to  
253 inhibit DA release. However, in the presence of GABA<sub>A</sub> and GABA<sub>B</sub> receptor antagonists, bicuculline (10 μM)  
254 and CGP 55845 (5 μM) respectively, the A<sub>1</sub>R agonist CPA (15 μM) significantly reduced [DA]<sub>o</sub> evoked in NAcC by  
255 single electrical pulses by ~40% (**Figure 1D**,  $t_{(4)} = 6.10$ ,  $p = 0.0036$ , paired t test), an effect that was not  
256 significantly different from that seen in the absence of GABA receptor antagonists (**Figure 1D**,  $F_{(1,9)} = 0.019$ ,  $p =$   
257  $0.892$ , two-way RM ANOVA: main effect of drug; **Figure 1E**,  $t_{(9)} = 0.259$ ,  $p = 0.802$ , unpaired t test), indicating  
258 that A<sub>1</sub> receptor agonists can inhibit DA release independently from indirect effects acting via striatal GABA  
259 modulation of DA.

260 To further test whether the inhibition of DA release by A<sub>1</sub>Rs requires the co-activation of other striatal neuron  
261 types or inputs, we tested whether A<sub>1</sub>Rs modulate DA release evoked optogenetically by targeted light  
262 activation of DA axons. Optogenetic activation of DA axons minimises the activation of other striatal neurons  
263 that occurs with non-selective electrical stimulation; optogenetically evoked DA release is independent of at  
264 least nAChR input (Threlfell et al., 2012; Melchior et al., 2015). We expressed ChR2-eYFP in DA neurons and  
265 axons in Slc6a3<sup>IRES-Cre</sup> mice using an established viral approach (**Figure 1F**) as we previously described (Roberts  
266 et al., 2020). CPA suppressed [DA]<sub>o</sub> evoked in NAcC by single brief (2 ms) blue light pulses (**Figure 1G**,  $t_{(7)} =$   
267  $16.2$ ,  $p < 0.0001$ , paired t test), indicating that A<sub>1</sub>Rs can inhibit DA release independently from not just Chl  
268 input to nAChRs but also without requiring the coincident activation of inputs from other neuron types,  
269 suggesting that A<sub>1</sub>R inhibition of DA release could be via direct action on DA axons, although actions via an  
270 unidentified tonically active input that is not GABA are possible.

### 271 Striatal A<sub>1</sub>Rs enhance the frequency- and activity-sensitivity of DA release

272 Previous studies exploring whether striatal A<sub>1</sub>Rs regulate DA release have predominantly focused on the  
273 effects on release evoked by single, discrete stimuli, and impact on release by the full range of physiological  
274 relevant frequencies has not been explored. Adenosine acts in a frequency-dependent manner on glutamate  
275 and GABA transmission in other brain nuclei, resulting in a stronger A<sub>1</sub>R-dependent inhibition of  
276 neurotransmission elicited by low-frequency versus high-frequency electrical stimulations, and therefore  
277 operating like a high-pass input filter on neurotransmitter release (e.g. neocortex: Perrier et al., 2019; Qi et al.,  
278 2017; Yang et al., 2007; hippocampus: Moore et al., 2003; calyx of Held: Wong et al., 2006). Other inputs and  
279 mechanisms that inhibit DA release by single stimuli can also promote the frequency dependence of DA  
280 release e.g. GABA (Lopes et al., 2019; Roberts et al., 2020) consistent with a reduction in the initial release  
281 probability and a consequent relief of some short-term depression (Condon et al., 2019). Using optogenetic  
282 activation, we observed a sizeable enhancement in the 5p:1p ratio (for 25 Hz) of light-evoked [DA]<sub>o</sub> in the  
283 NAcC following application of CPA (**Figure 1H**,  $t_{(7)} = 10.4$ ,  $p < 0.0001$ , paired t test), suggesting that striatal A<sub>1</sub>Rs  
284 might promote the sensitivity of DA release to firing rate.



285 We used electrical stimulation to investigate the effects of A<sub>1</sub>R activation on DA release across a full range of  
286 physiological DA neuron firing frequencies (1, 10, 50 and 100 Hz), with varying pulse numbers (5, 10, 15 and 20  
287 p). These experiments were carried out in the presence of nAChR antagonist DHβE (1 μM) to eliminate the  
288 effects of ChIs which profoundly restrict the apparent frequency- and activity-sensitivity of evoked DA release  
289 (Rice and Cragg, 2004; Zhang and Sulzer, 2004). A<sub>1</sub>R activation by CPA (15 μM) inhibited DA release inversely  
290 and significantly with stimulation frequency (**Figure 2A-B**,  $F_{(3, 18)} = 53.9$ ,  $p < 0.0001$ , one-way RM ANOVA), such  
291 that CPA significantly increased the frequency-dependence of evoked DA release (**Figure 2C**,  $F_{(1, 7)} = 38.2$ ,  $p =$   
292  $0.0005$ , two-way RM ANOVA: main effect of drug;  $F_{(3, 21)} = 23.0$ ,  $p < 0.0001$ , frequency x drug interaction). In  
293 addition, A<sub>1</sub>R activation by CPA inhibited DA release in a manner that varied inversely with number of pulses in  
294 a train (50 Hz) (**Figure 2D-E**,  $F_{(6, 24)} = 31.1$ ,  $p < 0.0001$ , one-way RM ANOVA) which significantly increased the  
295 pulse-dependence of evoked DA release (**Figure 2F**,  $F_{(1, 7)} = 46.7$ ,  $p = 0.0002$ , two-way RM ANOVA: main effect  
296 of drug;  $F_{(4, 28)} = 28.2$ ,  $p < 0.0001$ , pulse number x drug interaction). Therefore, striatal A<sub>1</sub>R do not simply inhibit  
297 DA release, but have a dynamic outcome depending on activity, that promotes the contrast in DA signals  
298 released by different activity.

#### 299 Adenosine operates a tonic inhibition on DA release

300 We next addressed whether A<sub>1</sub>Rs provide an endogenous inhibition of DA release levels and support the  
301 contrast in DA signals released by different activity. Previous *in vivo* microdialysis studies indicate that  
302 endogenous adenosine might even exert a tonic A<sub>1</sub>R-mediated inhibition of DA release, as systemic dosing or  
303 intrastriatal infusions of A<sub>1</sub>R antagonists (as well as competitive A<sub>1</sub> and A<sub>2A</sub> receptor antagonist caffeine  
304 (Solinas et al., 2002; Quarta et al., 2004b)), increase extracellular striatal DA levels (Okada et al., 1996; Quarta  
305 et al., 2004a; Borycz et al., 2007). These effects might involve indirect actions via long loop circuits that are  
306 intact *in vivo* that could modulate DA neuron firing in midbrain. We tested therefore whether endogenous  
307 inhibition of DA release by A<sub>1</sub>Rs could be localised to the NAcC and whether it occurs without co-activation of  
308 other neurons, indicative of a tonic inhibition of DA release, by exploring the effects of A<sub>1</sub>R antagonists on DA  
309 release in NAcC evoked either electrically or optogenetically in coronal striatal slices.

310 Application of the A<sub>1</sub>R antagonist CPT (10 μM) significantly enhanced [DA]<sub>o</sub> evoked by single or five pulses (50  
311 Hz) of electrical stimulation by ~30-40% (**Figure 3A**, 1p:  $t_{(6)} = 5.10$ ,  $p = 0.0022$ ; 5p:  $t_{(6)} = 5.13$ ,  $p = 0.0022$ ; paired  
312 t tests), and in turn, decreased the ratio of [DA]<sub>o</sub> evoked by 5p:1p (**Figure 3B**,  $t_{(6)} = 3.72$ ,  $p = 0.0099$ , paired t  
313 test), indicative of an underlying regulation of DA release by endogenous adenosine. Caffeine (20 μM) also  
314 significantly enhanced [DA]<sub>o</sub> evoked by single or five pulses (50 Hz) of electrical stimulation by ~20-10% (**Figure**  
315 **3C**; 1p:  $t_{(5)} = 3.69$ ,  $p = 0.014$ ; 5p:  $t_{(5)} = 3.49$ ,  $p = 0.018$ ; paired t tests) and decreased the ratio of [DA]<sub>o</sub> evoked by  
316 5p:1p ratio (**Figure 3D**,  $t_{(5)} = 3.59$ ,  $p = 0.016$ , paired t test). We then investigated whether A<sub>1</sub>R-mediated  
317 inhibition of DA release by endogenous adenosine might arise through an ambient adenosine tone, by  
318 exploring whether A<sub>1</sub>R antagonist CPT could promote DA release when evoked using optogenetic stimulation  
319 to activate DA axons selectively without co-activation of other striatal cell types that might provide a source of  
320 endogenous adenosine. CPT significantly enhanced [DA]<sub>o</sub> evoked by single and five pulses (25 Hz) of light in  
321 Slc6a3<sup>IRE5-Cre</sup> ChR2-expressing mice by ~20-30% (**Figure 3E**, 1p:  $t_{(7)} = 5.58$ ,  $p = 0.0008$ ; 5p:  $t_{(7)} = 5.51$ ,  $p = 0.0009$ ;

322 paired t tests) and decreased the ratio of  $[DA]_o$  evoked by 5p:1p (25 Hz) (**Figure 3F**,  $t_{(7)} = 13.50$ ,  $p < 0.0001$ ,  
323 paired t test). These data therefore suggest that striatal DA release is under tonic inhibition by an ambient  
324 adenosine tone at  $A_1$ Rs, which promotes contrast in DA signals released by different activity.

### 325 ENT1 on astrocytes is a regulator of tonic $A_1$ R-mediated inhibition of DA release

326 We next tested the hypothesis that striatal ENT1 and, by association, astrocytes, by governing ambient  
327 adenosine levels (Nagai *et al.*, 2005; Young *et al.*, 2008; Tanaka *et al.*, 2011; Nguyen *et al.*, 2015; Cheffer *et al.*,  
328 2018; Hong *et al.*, 2020), might determine the level of tonic  $A_1$ R-mediated inhibition of evoked DA release in  
329 NAcC. We first inhibited ENT1 activity by pre-treatment of slices with the selective ENT1 inhibitor NBTI (10  $\mu$ M,  
330 for 45 – 60 min), which has previously been shown to increase adenosine levels in striatum (Pajski and Venton,  
331 2010). ENT1 inhibition itself attenuated  $[DA]_o$  evoked by single and five pulses (50 Hz) of electrical stimulation  
332 (**Figure 4A**; 1p:  $t_{(12)} = 4.38$ ,  $p = 0.0009$ ; 5p:  $t_{(12)} = 3.02$ ,  $p = 0.0107$ ; unpaired t tests). Furthermore, after pre-  
333 treatment with NBTI, the  $A_1$ R antagonist CPT (10  $\mu$ M) enhanced  $[DA]_o$  evoked by single electrical pulses to a  
334 significantly greater degree than in control slices (**Figure 4B**,  $F_{(1, 12)} = 27.17$ ,  $p = 0.0002$ , two-way RM ANOVA:  
335 main effect of drug). CPT decreased the ratio of  $[DA]_o$  evoked by 5p:1p (50 Hz) in both conditions (**Figure 4C**,  
336  $F_{(1, 12)} = 35.48$ ,  $p < 0.0001$ , two-way RM ANOVA: main effect of drug), but there was a significant statistical  
337 interaction between NBTI and CPT (**Figure 4C**,  $F_{(1, 12)} = 9.48$ ,  $p = 0.0096$ , two-way RM ANOVA: NBTI x CPT  
338 interaction) borne out by a greater decrease in this ratio in slices pre-treated with NBTI compared to control  
339 slices (**Figure 4D**,  $t_{(12)} = 3.08$ ,  $p = 0.0096$ , unpaired t test). These data suggest that ENT1 regulates, and in  
340 particular limits, how  $A_1$  receptors tonically inhibit DA release and support its associated activity-sensitivity.

341 We then tested conversely whether an upregulation of ENT1 specifically on astrocytes could diminish the level  
342 of endogenous  $A_1$ R-mediated inhibition of DA release. We targeted fluorescence-tagged ENT1 to astrocytes in  
343 the NAcC (**Figure 4E-F**) using a viral approach already validated for striatal astrocytes (Hong *et al.*, 2020; Jia *et*  
344 *al.*, 2020). Astrocyte-targeted ENT1-overexpression (ENT1-OX) increased  $[DA]_o$  evoked by single and five pulses  
345 (50 Hz) of electrical stimulation compared to targeted mCherry controls (**Figure 4G**, 1p:  $t_{(15)} = 3.29$ ,  $p = 0.0049$ ;  
346 5p:  $t_{(15)} = 3.49$ ,  $p = 0.0033$ ; unpaired t tests). Furthermore, with ENT1-OX, the  $A_1$ R antagonist CPT (10  $\mu$ M)  
347 enhanced  $[DA]_o$  evoked by single electrical pulses to a significantly lesser degree than in mCherry controls  
348 (**Figure 4H**,  $F_{(1, 15)} = 20.12$ ,  $p = 0.0004$ , two-way RM ANOVA: main effect of drug). CPT decreased the ratio of  
349  $[DA]_o$  evoked by 5p:1p (50 Hz) in ENT1-OX and mCherry controls (**Figure 4I**,  $F_{(1, 15)} = 46.28$ ,  $p < 0.0001$ , two-way  
350 RM ANOVA: main effect of drug), but there was a significant statistical interaction between ENT1-OX and CPT  
351 (**Figure 4I**,  $F_{(1, 15)} = 9.54$ ,  $p = 0.0075$ , two-way RM ANOVA: ENT1-OX x CPT interaction), which was borne out by  
352 a smaller decrease in this ratio following CPT application in ENT1-OX than in controls (**Figure 4J**,  $t_{(15)} = 3.09$ ,  $p =$   
353  $0.0075$ , unpaired t test). Together, these data suggest that ENT1 on astrocytes in particular can support  
354 adenosine uptake and set the level of inhibition and regulation of activity-dependence of DA release by  
355 ambient adenosine acting at  $A_1$ Rs.

356 To resolve directly whether ENT1, and astrocytes, govern striatal adenosine levels, we detected adenosine  
357 levels by imaging the recently developed GRAB-Ado sensor (Peng *et al.*, 2020; Wu *et al.*, 2020), a virally

358 expressed genetic reporter, injected into striatum (**Figure 5A**). We confirmed that striatal GRAB-Ado sensor  
359 fluorescence responded to adenosine concentrations in a concentration-dependent manner on application of  
360 exogenous adenosine to slices (**Figure 5B**,  $F_{(3,35)} = 28.73$ ,  $p < 0.0001$ , one-way ANOVA), and with a large range  
361 of dF/F. To assess the impact of ENT1 on ambient adenosine tone in NAcC, we imaged GRAB-Ado fluorescence  
362 before and after ENT1 inhibition, in the absence of any stimulation. Bath application of ENT1 inhibitor NBTI (10  
363  $\mu\text{M}$ ) increased fluorescence compared to vehicle controls (**Figure 5C**,  $F_{(1,18)} = 57.8$ ,  $p < 0.0001$ , two-way RM  
364 ANOVA: main effect of NBTI), indicating that ENT1 limits extracellular adenosine levels. To test whether ENT1  
365 on astrocytes participate in this mechanism, we tested whether metabolic inhibition of astrocytes limited ENT1  
366 function. We pre-treated slices with the gliotoxin fluorocitrate (100  $\mu\text{M}$ , for 45 – 60 min), which has been  
367 established to induce metabolic arrest in astrocytes, render them inactive and prevent the effects of astrocytic  
368 transporters (Paulsen et al., 1987; Henneberger et al., 2010; Bonansco et al., 2011; Boddum et al., 2016;  
369 Roberts et al., 2020). The effects of ENT1 inhibitor NBTI on GRAB-Ado fluorescence were occluded after pre-  
370 treatment with fluorocitrate (**Figure 5D**,  $F_{(1,14)} = 14.32$ ,  $p = 0.002$ , two-way RM ANOVA: main effect of FC).

371 To further characterise and validate the role of ENT1 and astrocytes in striatal adenosine signalling, we  
372 explored their impact on the dynamics of extracellular adenosine transients evoked electrically by trains of  
373 electrical stimulation (100 pulses, 50 Hz) (**Figure 5E**). Evoked increases in extracellular adenosine  
374 concentrations exhibited relatively extended rise times ( $\sim 30$  sec) and clearance times as reported previously in  
375 cultured hippocampal neurons and acute hippocampal and medial prefrontal cortex mouse brain slices (Wu et  
376 al., 2020), and surprisingly release was activated via a mechanism that was not prevented by  $\text{Na}_v$  blocker TTX  
377 (1  $\mu\text{M}$ ). (**Figure 5E**,  $F_{(3,29)} = 13.60$ ,  $p < 0.0001$ , one-way ANOVA; TTX vs control:  $p > 0.99$ , Sidak's multiple  
378 comparisons). In slices pre-treated with the ENT1 inhibitor NBTI (10  $\mu\text{M}$ , for 45 – 60 min), the peak of evoked  
379 adenosine levels was attenuated (**Figure 5E**,  $F_{(3,29)} = 13.60$ ,  $p < 0.0001$ , one-way ANOVA; NBTI vs control:  $p =$   
380 0.001, Sidak's multiple comparisons), but the clearance time constant was extended (**Figure 5F**,  $F = 8543$ ,  $p <$   
381 0.0001, extra-sum-of-squares F test; control:  $\tau = 108.4$ , NBTI:  $\tau = 564.5$ ), indicating reduced release and uptake,  
382 and seen previously in cultured hippocampal neurons (Wu et al., 2020). In slices pre-treated with the gliotoxin  
383 fluorocitrate (100  $\mu\text{M}$ , for 45 – 60 min), both the peak level of adenosine and the time constant for clearance  
384 were elevated (**Figure 5E**,  $F_{(3,29)} = 13.60$ ,  $p < 0.0001$ , one-way ANOVA; FC vs control:  $p = 0.049$ , Sidak's multiple  
385 comparisons; **Figure 5F**,  $F = 8543$ ,  $p < 0.0001$ , extra-sum-of-squares F test; control:  $\tau = 108.4$ , FC:  $\tau = 217.0$ ),  
386 indicating that ENT1 on astrocytes support adenosine uptake

### 387 *EtOH increases tonic $A_1R$ -mediated inhibition of DA release*

388 Our data indicate that astrocytic ENT1 function regulates tonic  $A_1R$ -mediated inhibition of DA output in NAcC.  
389 Acute exposure to ethanol is documented to increase extracellular adenosine levels in many brain nuclei,  
390 including striatum, via inhibition of adenosine uptake by ENT1 (Nagy et al., 1989, 1990; Choi et al., 2004).  
391 Given that ethanol also attenuates evoked DA release in NAc (Yorgason et al., 2014, 2015; Karkhanis et al.,  
392 2015; Rose et al., 2016), we tested whether acute ethanol exposure might increase tonic  $A_1R$ -mediated  
393 inhibition of DA release via impaired ENT1 function. We pre-treated slices with ethanol (2–3 hrs), at a  
394 concentration (50 mM) that correlates to a blood alcohol concentration of 230 mg/dl in humans and is

395 consistent with what late-stage alcoholics achieve (Brick and Erickson, 2009). We first confirmed that pre-  
396 treating slices with ethanol using this paradigm reduced  $[DA]_o$  evoked by single and five pulses (50 Hz) of  
397 electrical stimulation in NAcC (**Figure 6A**, 1p:  $t_{(12)} = 2.74$ ,  $p = 0.018$ ; 5p:  $t_{(12)} = 2.67$ ,  $p = 0.020$ ; unpaired t tests).  
398 Next, we found that the effect of  $A_1R$  antagonism with CPT (10  $\mu M$ ) on  $[DA]_o$  evoked by single electrical pulses  
399 was elevated compared to control slices (**Figure 6B**,  $F_{(1, 12)} = 18.04$ ,  $p = 0.0011$ , two-way RM ANOVA: main  
400 effect of drug).  $A_1$  receptor antagonism with CPT decreased the ratio of  $[DA]_o$  evoked by 5p:1p (50 Hz) (**Figure**  
401 **6C**,  $F_{(1, 12)} = 68.51$ ,  $p < 0.0001$ , two-way RM ANOVA: main effect of drug), and there was a significant interaction  
402 between ethanol and CPT (**Figure 6C**,  $F_{(1, 12)} = 9.36$ ,  $p = 0.0099$ , two-way RM ANOVA: ethanol x CPT interaction),  
403 which was borne out by a more pronounced decrease after ethanol than in control slices (**Figure 6D**,  $t_{(12)} =$   
404  $3.16$ ,  $p = 0.0082$ , unpaired t test). To test directly whether ethanol in this paradigm impaired adenosine uptake  
405 by ENT1, we imaged tonic extracellular adenosine levels with the GRAB-Ado sensor during application of ENT1  
406 inhibitor NBTI (10  $\mu M$ ). NBTI increased tonic extracellular adenosine levels in NAcC to a significantly lesser  
407 degree in slices preincubated with ethanol than controls (**Figure 6E**,  $F_{(1, 17)} = 11.30$ ,  $p = 0.0037$ , two-way RM  
408 ANOVA: main effect of drug;  $t_{(17)} = 2.60$ ,  $p = 0.019$ , unpaired t test). These data indicate that tonic  $A_1R$ -  
409 mediated inhibition of DA axons by adenosine in the NAcC is elevated by acute ethanol exposure, paralleled by  
410 an underlying attenuated uptake of adenosine uptake by ENT1.

411

## 412 **DISCUSSION** (1,636 words)

413 Here, we reveal that DA release in NAcC is under a tonic inhibition by ambient adenosine levels acting at  $A_1R$ s,  
414 and that ENT1, located at least in part on striatal astrocytes, governs the level of this tonic inhibition.  
415 Moreover, we reveal that ethanol promotes  $A_1R$ -inhibition of DA release, through elevating adenosine levels  
416 by diminishing adenosine uptake via ENT1. These data support the emerging concept that astrocytes play  
417 important roles in setting the level of striatal DA output, in health and disease.

### 418 Direct versus indirect actions of $A_1R$ s

419 Our data provide functional evidence for direct regulation of DA release by  $A_1R$ s. Immunocytochemical studies  
420 in rat striatal synaptosomes indicate that dopaminergic axons can contain  $A_1R$ s (Borycz et al., 2007), but direct  
421 immunocytochemical evidence *in situ* is currently lacking. We excluded indirect actions of  $A_1R$ s via key  
422 candidate pathways, namely cholinergic inputs that act via nAChRs and GABAergic networks that act via  
423  $GABA_A/GABA_B$  receptors on DA axons. Previous reports have excluded effects of glutamatergic modulation  
424 (Borycz et al., 2007; O'Connor and O'Neill, 2008). Moreover, we found that  $A_1R$  agonists inhibited DA release  
425 evoked by even single short optogenetic stimulation of Chr2-expressing DA axons, which should not co-  
426 activate other striatal neurons, suggesting that the location(s) for  $A_1R$ s that regulate DA are either a currently  
427 undisclosed tonically active cell type with currently unknown actions on DA or, more parsimoniously, DA axons  
428 themselves.

429 Tonic inhibition

430 A<sub>1</sub>R antagonists enhanced DA release evoked by single short optogenetic stimulation, suggesting that A<sub>1</sub>R  
431 activation does not require stimulation of any other network, and is tonically activated by an ambient striatal  
432 adenosine tone. An adenosine tone at striatal A<sub>1</sub>Rs has previously been described on glutamate inputs in NAcC  
433 (Brundege and Williams, 2002; Choi et al., 2004). Extracellular adenosine concentrations in the brain have  
434 been suggested to be in the range of 25–250 nM under basal conditions, which are sufficient to activate high-  
435 affinity A<sub>1</sub>Rs (Dunwiddie and Masino, 2001). In further support for a resting adenosine tone in NAcC, we could  
436 detect extracellular adenosine with the GRAB-Ado sensor, following application of an ENT1 inhibitor, in the  
437 absence of any striatal stimulation. The source of adenosine is still undetermined, but can arise from the  
438 catabolism of ATP from neuronal and non-neuronal sources (Latini and Pedata, 2008), including astrocytes  
439 (Corkrum et al., 2020).

440 A<sub>1</sub>Rs modify DA signal contrast for firing frequency

441 We found that A<sub>1</sub>R activation not only limits the overall amplitude of DA output, but promotes the contrast in  
442 DA signals released by different firing rates and pulse numbers, and vice versa, A<sub>1</sub>R antagonists reduce this  
443 contrast. The strength of A<sub>1</sub>R-mediated inhibition of DA release varied with adenosine concentration, resulting  
444 from ENT1 inhibition or overexpression, and furthermore, was greater for lower frequencies of activation of  
445 DA axons. These data indicate that an adenosine tone preferentially limits DA output during the lower  
446 frequencies of DA neuron activity that represent tonic activity, while leaving relatively intact the DA release  
447 evoked by the higher frequencies associated with phasic activity in DA neurons. The preferential inhibition of  
448 DA release by low frequencies of activity parallels the effects of GABA input to DA axons (Lopes et al., 2019;  
449 Roberts et al., 2020; Roberts et al., 2021) and could indicate a preferential influence of striatal adenosine on  
450 DA functions that are proposed to be mediated by low frequencies of activity e.g. the ongoing monitoring of  
451 reward value and its changes (Wang et al., 2021). We identified an underlying change in the dynamic short-  
452 term plasticity (STP) of DA output that corresponds to this change to frequency filtering, that again parallels  
453 the effect of GABA on STP in DA release (Lopes et al., 2019; Roberts et al., 2020). Elsewhere in the brain, A<sub>1</sub>R  
454 activation, including through ambient adenosine, can modulate STP of glutamate transmission through a  
455 presynaptic mechanism (Perrier et al., 2019; Qi et al., 2017; Yang et al., 2007; Moore et al., 2003; Wong et al.,  
456 2006). A<sub>1</sub>Rs are G<sub>i/o</sub> coupled, and so their activation causes inhibition of adenylyl cyclase, activation of  
457 potassium channels and inactivation of voltage-gated calcium channels (VGCCs) (Haas and Selbach, 2000). We  
458 have recently revealed that mechanisms that determine axonal excitability, particularly potassium-dependent  
459 processes, strongly gate STP of DA release (Condon et al., 2019) while calcium largely gates amplitude. We  
460 therefore hypothesise that A<sub>1</sub>Rs on striatal DA axons likely inhibit the overall amplitude of DA release via  
461 reduced VGCC activity while simultaneously gating the STP of DA release by modifying axonal excitability via  
462 potassium-dependent conductances. Future studies are needed to establish these potential mechanisms.

463 ENT1 and astrocytes are key regulators of tonic A<sub>1</sub>R-inhibition of DA release

464 We established that ENT1 in NAcC limits ambient adenosine levels and tonic A<sub>1</sub>R-inhibition of DA axons, and  
465 thereby indirectly facilitates DA release. ENT1 usually facilitates adenosine uptake from the extracellular  
466 milieu, but can reverse to release adenosine (Parkinson et al., 2011), and ENT1 has been shown to facilitate  
467 adenosine release evoked by electrical stimulation in cultured hippocampal neurons (Wu et al., 2020).  
468 Intriguingly, we found that adenosine release driven by electrical stimulation was TTX-insensitive and sensitive  
469 to ENT1 inhibition. Together, our data show that ambient adenosine in NAcC is limited by uptake via ENT1, but  
470 can be released via ENT1 reversal in some conditions. There is an additional ENT in striatum, ENT2 (Jennings et  
471 al., 2001; Anderson et al., 2002), whose roles we did not explore. ENT1 is thought to be responsible for the  
472 majority of adenosine transport and, subsequently, the key regulator of extracellular adenosine levels across  
473 the brain (Young et al., 2008).

474 We found a major role for ENT1 located to striatal astrocytes, although we did not test or exclude roles for  
475 ENT1 located on neurons. The glial metabolic poison fluorocitrate limited the effects of ENT1 inhibitors on  
476 adenosine tone, while overexpressing ENT1 in astrocytes boosted evoked DA release by limiting tonic A<sub>1</sub>R-  
477 inhibition. This strategy for viral overexpression of ENT1 in striatal astrocytes has previously been shown to  
478 increase ENT1 expression by ~30%, but also increases striatal GFAP expression and modifies astrocyte  
479 morphology (Hong et al., 2020). ENT1 expression has also been shown to regulate astrocyte-specific excitatory  
480 amino acid transporter 2 (EAAT2) and aquaporin-4 expression in NAcC (Wu et al., 2010; Lee et al., 2013). These  
481 additional astrocyte-specific modifications might also contribute to boosted DA signalling in NAcC, beyond  
482 mechanisms involving tonic inhibition by adenosine tone. Regardless, astrocytic ENT1 in striatum has  
483 previously been reported to play key roles in reward-seeking behaviours (Hong et al., 2020; Kang et al., 2020),  
484 which our data suggest could be mediated by underlying changes to DA signalling.

485 The role for ENT1 on astrocytes in gating DA output parallels our recent finding that GABA transporters (GAT1  
486 and GAT3) on astrocytes in dorsal striatum set the level of tonic GABAergic inhibition of DA release (Roberts et  
487 al., 2020). Furthermore, EAAT2, enriched on astrocytes, limits glutamate-mediated inhibition of DA release  
488 (Zhang and Sulzer, 2003), and thus, our collective findings point to astrocytic transporters across  
489 neurotransmitter categories as regulators of DA release.

#### 490 *Dysregulation of A<sub>1</sub>R-inhibition of DA release by ethanol*

491 To probe the wider potential significance of the regulation of DA in NAcC by adenosine tone and ENT1, we  
492 explored whether A<sub>1</sub>R inhibition of DA release was modified by ethanol. Ethanol has been shown to increase  
493 extracellular adenosine levels by impairing adenosine uptake via ENT1 after acute exposure (Nagy et al., 1989,  
494 1990; Choi et al., 2004), and separately, to reduce DA release following acute application (Yorgason et al.,  
495 2014, 2015) or following chronic intermittent exposure in mice (Karkhanis et al., 2015; Rose et al., 2016). Here  
496 we bridge these different findings by revealing that ethanol can reduce DA output via a boosted tonic A<sub>1</sub>R-  
497 inhibition. While pre-treating slices with 50 mM ethanol to understand disruption to cellular and circuit  
498 function has limitations in informing effects on behaviour, we speculate that this mechanism could help to  
499 explain how striatal A<sub>1</sub>Rs contribute to the ataxic and hypnotic effects of ethanol (Meng and Dar, 1995; Phan et

500 al., 1997; Dar, 2001), as well as how acute ethanol exposure attenuates concurrent GABA co-release from DA  
501 axons in dorsal striatum (Kim et al., 2015).

502 Chronic ethanol exposure is thought to evoke an adaptive response, resulting in decreased ENT1 expression,  
503 and therefore a reduced ability for ethanol to increase extracellular adenosine (Nagy et al., 1989). Indeed, rats  
504 permitted daily access to ethanol for 8 weeks exhibit downregulated ENT1 gene expression in NAc (Bell et al.,  
505 2009). ENT1-null mice exhibit reduced hypnotic and ataxic responses to ethanol, increased ethanol  
506 consumption, and decreased adenosine tone in NAc, while viral-mediated rescue of ENT1 expression in NAc  
507 reduces ethanol consumption (Choi et al., 2004; Jia et al., 2020). Furthermore, growing evidence implicates  
508 striatal adenosine signalling in the neurobiological adaptations of other drugs of abuse (Bachtell, 2017;  
509 Ballesteros-Yáñez et al., 2018). Repeated cocaine administration enhances adenosine uptake, reduces  
510 adenosine tone, and reduces plasma membrane A<sub>1</sub>R expression in NAcC (Manzoni et al., 1998; Toda et al.,  
511 2003), while striatal  $\mu$ -opioid receptor activation by opioids results in reduced striatal adenosine tone in  
512 dorsomedial striatum (Adhikary and Birdsong, 2021). Dysregulated tonic A<sub>1</sub>R-inhibition of glutamate afferents  
513 in NAc is thought to be a key circuit adaptation underlying ethanol abuse and other drugs of abuse (Choi et al.,  
514 2004; Chen et al., 2010; Wu et al., 2010; Nam et al., 2011); however, given the role adenosine tone plays in  
515 setting the level and activity-dependence of DA output we describe here, we speculate that dysregulated tonic  
516 A<sub>1</sub>R-inhibition of DA release in NAcC might also be an important circuit adaptation underlying drug abuse.

517 In conclusion, we show here that A<sub>1</sub>Rs can tonically inhibit DA output through an ambient adenosine tone, and  
518 that A<sub>1</sub>Rs additionally regulate the activity-sensitivity of DA release, preferentially impacting on release by low  
519 frequencies. Furthermore, we find that tonic A<sub>1</sub>R-inhibition of DA release is regulated by ENT1 and astrocytes,  
520 and dysregulated by ethanol. These data provide a further mechanism through which ethanol modulates  
521 striatal DA function, and corroborate emerging data highlighting astrocytic transporters as important  
522 regulators of striatal function.

523

## 524 REFERENCES

525 Adhikary S, Birdsong WT (2021)  $\mu$  opioid receptors acutely regulate adenosine signaling in a thalamo-striatal  
526 circuit. bioRxiv:2021.05.25.445648.

527 Alexander SP, Reddington M (1989) The cellular localization of adenosine receptors in rat neostriatum.  
528 *Neuroscience* 28:645–651.

529 Anderson CM, Xiong W, Geiger JD, Young JD, Cass CE, Baldwin SA, Parkinson FE (2002) Distribution of  
530 equilibrative, nitrobenzylthioinosine-sensitive nucleoside transporters (ENT1) in brain. *J Neurochem*  
531 73:867–873.

532 Bachtell RK (2017) Cocaine addiction and adenosine A<sub>1</sub> and A<sub>2A</sub> receptors. In: *The neuroscience of cocaine:  
533 mechanisms and treatment*, pp 429–437. Elsevier Inc.

- 534 Ballesteros-Yáñez I, Castillo CA, Merighi S, Gessi S (2018) The role of adenosine receptors in psychostimulant  
535 addiction. *Front Pharmacol* 8:985.
- 536 Bell RL, Kimpel MW, McClintick JN, Strother WN, Carr LG, Liang T, Rodd ZA, Mayfield RD, Edenberg HJ, McBride  
537 WJ (2009) Gene expression changes in the nucleus accumbens of alcohol-preferring rats following  
538 chronic ethanol consumption. *Pharmacol Biochem Behav* 94:131–147.
- 539 Boddum K, Jensen TP, Magloire V, Kristiansen U, Rusakov DA, Pavlov I, Walker MC (2016) Astrocytic GABA  
540 transporter activity modulates excitatory neurotransmission. *Nat Commun* 7:13572.
- 541 Bonansco C, Couve A, Perea G, Ferradas CA, Roncagliolo M, Fuenzalida M (2011) Glutamate released  
542 spontaneously from astrocytes sets the threshold for synaptic plasticity. *Eur J Neurosci* 33:1483–1492.
- 543 Borycz J, Pereira MF, Melani A, Rodrigues RJ, Köfalvi A, Panlilio L, Pedata F, Goldberg SR, Cunha RA, Ferré S  
544 (2007) Differential glutamate-dependent and glutamate-independent adenosine A<sub>1</sub> receptor-mediated  
545 modulation of dopamine release in different striatal compartments. *J Neurochem* 101:355–363.
- 546 Brick J, Erickson CK (2009) Intoxication is not always visible: an unrecognized prevention challenge. *Alcohol Clin  
547 Exp Res* 33:1489–1507.
- 548 Britt JP, McGehee DS (2008) Presynaptic opioid and nicotinic receptor modulation of dopamine overflow in the  
549 nucleus accumbens. *J Neurosci* 28:1672–1681.
- 550 Brown SJ, James S, Reddington M, Richardson PJ (1990) Both A1 and A2a purine receptors regulate striatal  
551 acetylcholine release. *J Neurochem* 55:31–38.
- 552 Brundage JM, Williams JT (2002) Differential modulation of nucleus accumbens synapses. *J Neurophysiol*  
553 88:142–151.
- 554 Chai H, Diaz-Castro B, Shigetomi E, Monte E, Oceau JC, Yu X, Cohn W, Rajendran PS, Vondriska TM,  
555 Whitelegge JP, Coppola G, Khakh BS (2017) Neural circuit-specialized astrocytes: transcriptomic,  
556 proteomic, morphological, and functional evidence. *Neuron* 95:531-549.
- 557 Cheffer A, Castillo ARG, Corrêa-Velloso J, Gonçalves MCB, Naaldijk Y, Nascimento IC, Burnstock G, Ulrich H  
558 (2018) Purinergic system in psychiatric diseases. *Mol Psychiatry* 23:94–106.
- 559 Chen J, Nam HW, Lee MR, Hinton DJ, Choi S, Kim T, Kawamura T, Janak PH, Choi DS (2010) Altered  
560 glutamatergic neurotransmission in the striatum regulates ethanol sensitivity and intake in mice lacking  
561 ENT1. *Behav Brain Res* 208:636–642.
- 562 Choi DS, Cascini MG, Mailliard W, Young H, Paredes P, McMahon T, Diamond I, Bonci A, Messing RO (2004) The  
563 type 1 equilibrative nucleoside transporter regulates ethanol intoxication and preference. *Nat Neurosci*  
564 7:855–861.
- 565 Condon MD, Platt NJ, Zhang YF, Roberts BM, Clements MA, Vietti-Michelina S, Tseu MY, Brimblecombe KR,  
566 Threlfell S, Mann EO, Cragg SJ (2019) Plasticity in striatal dopamine release is governed by release-  
567 independent depression and the dopamine transporter. *Nat Commun* 10:1–15.



- 568 Corkrum M, Covelo A, Lines J, Bellocchio L, Pisansky M, Loke K, Quintana R, Rothwell PE, Lujan R, Marsicano G,  
569 Martin ED, Thomas MJ, Kofuji P, Araque A (2020) Dopamine-evoked synaptic regulation in the nucleus  
570 accumbens requires astrocyte activity. *Neuron* 105:1036-1047.
- 571 Dar MS (2001) Modulation of ethanol-induced motor incoordination by mouse striatal A1 adenosinergic  
572 receptor. *Brain Res Bull* 55:513–520.
- 573 Dunwiddie T V., Masino SA (2001) The role and regulation of adenosine in the central nervous system. *Annu*  
574 *Rev Neurosci* 24:31–55.
- 575 Ferré S, O'Connor WT, Svenningsson P, Björklund L, Lindberg J, Tinner B, Strömberg I, Goldstein M, Ögren SO,  
576 Ungerstedt U, Fredholm BB, Fuxe K (1996) Dopamine D1 receptor-mediated facilitation of GABAergic  
577 neurotransmission in the rat strioentpeduncular pathway and its modulation by adenosine A1 receptor-  
578 mediated mechanisms. *Eur J Neurosci* 8:1545–1553.
- 579 Haas HL, Selbach O (2000) Functions of neuronal adenosine receptors. *Naunyn Schmiedebergs Arch Pharmacol*  
580 362:375–381.
- 581 Hartung H, Threlfell S, Cragg SJ (2011) Nitric oxide donors enhance the frequency dependence of dopamine  
582 release in nucleus accumbens. *Neuropsychopharmacology* 36:1811–1822.
- 583 Henneberger C, Papouin T, Oliet SHR, Rusakov DA (2010) Long-term potentiation depends on release of d-  
584 serine from astrocytes. *Nature* 463:232–236.
- 585 Hong S, Bullert A, Baker M, Choi D (2020) Astrocytic equilibrative nucleoside transporter type 1 upregulations  
586 in the dorsomedial and dorsolateral striatum distinctly coordinate goal-directed and habitual ethanol-  
587 seeking behaviours in mice. *Eur J Neurosci:ejn*.14752.
- 588 Jennings LL, Hao C, Cabrita MA, Vickers MF, Baldwin SA, Young JD, Cass CE (2001) Distinct regional distribution  
589 of human equilibrative nucleoside transporter proteins 1 and 2 (hENT1 and hENT2) in the central  
590 nervous system. *Neuropharmacology* 40:722–731.
- 591 Jia YF, Vadnie CA, Ho AMC, Peyton L, Veldic M, Wininger K, Matveyenko A, Choi DS (2020) Type 1 equilibrative  
592 nucleoside transporter (ENT1) regulates sex-specific ethanol drinking during disruption of circadian  
593 rhythms. *Addict Biol* 25:e12801.
- 594 Jones IW, Paul Bolam J, Wonnacott S (2001) Presynaptic localisation of the nicotinic acetylcholine receptor  $\beta$ 2  
595 subunit immunoreactivity in rat nigrostriatal dopaminergic neurones. *J Comp Neurol.* 439:235–247.
- 596 Kang S, Hong SI, Lee J, Peyton L, Baker M, Choi S, Kim H, Chang SY, Choi DS (2020) Activation of astrocytes in  
597 the dorsomedial striatum facilitates transition from habitual to goal-directed reward-seeking behavior.  
598 *Biol Psychiatry* 88:797–808.
- 599 Karkhanis AN, Rose JH, Huggins KN, Konstantopoulos JK, Jones SR (2015) Chronic intermittent ethanol  
600 exposure reduces presynaptic dopamine neurotransmission in the mouse nucleus accumbens. *Drug*  
601 *Alcohol Depend* 150:24–30.

- 602 Kim JI, Ganesan S, Luo SX, Wu YW, Park E, Huang EJ, Chen L, Ding JB (2015) Aldehyde dehydrogenase 1a1  
603 mediates a GABA synthesis pathway in midbrain dopaminergic neurons. *Science* 350:102–106.
- 604 Kosillo P, Zhang Y-F, Threlfell S, Cragg SJ (2016) Cortical control of striatal dopamine transmission via striatal  
605 cholinergic interneurons. *Cereb Cortex* 26:4160–4169.
- 606 Latini S, Pedata F (2008) Adenosine in the central nervous system: release mechanisms and extracellular  
607 concentrations. *J Neurochem* 79:463–484.
- 608 Lee MR, Ruby CL, Hinton DJ, Choi S, Adams CA, Young Kang N, Choi DS (2013) Striatal adenosine signaling  
609 regulates EAAT2 and astrocytic AQP4 expression and alcohol drinking in mice.  
610 *Neuropsychopharmacology* 38:437–445.
- 611 Lemos JC, Shin JH, Alvarez VA (2019) Striatal cholinergic interneurons are a novel target of corticotropin  
612 releasing factor. *J Neurosci* 39:5647–5661.
- 613 Lopes EF, Roberts BM, Siddorn RE, Clements MA, Cragg SJ (2019) Inhibition of nigrostriatal dopamine release  
614 by striatal GABA A and GABA B receptors. *J Neurosci* 39:1058–1065.
- 615 Manzoni O, Pujalte D, Williams J, Bockaert J (1998) Decreased presynaptic sensitivity to adenosine after  
616 cocaine withdrawal. *J Neurosci* 18:7996–8002.
- 617 Melchior JR, Ferris MJ, Stuber GD, Riddle DR, Jones SR (2015) Optogenetic versus electrical stimulation of  
618 dopamine terminals in the nucleus accumbens reveals local modulation of presynaptic release. *J*  
619 *Neurochem* 134:833–844.
- 620 Meng Z-H, Dar MS (1995) Possible role of striatal adenosine in the modulation of acute ethanol-induced motor  
621 incoordination in rats. *Alcohol Clin Exp Res* 19:892–901.
- 622 Moore KA, Nicoll RA, Schmitz D (2003) Adenosine gates synaptic plasticity at hippocampal mossy fiber  
623 synapses. *Proc Natl Acad Sci U S A* 100:14397–14402.
- 624 Nagai K, Nagasawa K, Fujimoto S (2005) Transport mechanisms for adenosine and uridine in primary-cultured  
625 rat cortical neurons and astrocytes. *Biochem Biophys Res Commun* 334:1343–1350.
- 626 Nagy LE, Diamond I, Casso DJ, Franklin C, Gordon AS (1990) Ethanol increases extracellular adenosine by  
627 inhibiting adenosine uptake via the nucleoside transporter. *J Biol Chem* 265:1946–1951.
- 628 Nagy LE, Diamond I, Collier K, Lopez L, Ullman B, Gordon AS (1989) Adenosine is required for ethanol-induced  
629 heterologous desensitization. *Mol Pharmacol* 36:744–748.
- 630 Nam HW, Lee MR, Zhu Y, Wu J, Hinton DJ, Choi S, Kim T, Hammack N, Yin JCP, Choi DS (2011) Type 1  
631 equilibrative nucleoside transporter regulates ethanol drinking through accumbal N-methyl-D-aspartate  
632 receptor signaling. *Biol Psychiatry* 69:1043–1051.
- 633 Nguyen MD, Ross AE, Ryals M, Lee ST, Venton BJ (2015) Clearance of rapid adenosine release is regulated by  
634 nucleoside transporters and metabolism. *Pharmacol Res Perspect* 3:1–12.
- 635 Nolan SO, Zachry JE, Johnson AR, Brady LJ, Siciliano CA, Calipari ES (2020) Direct dopamine terminal regulation

- 636 by local striatal microcircuitry. *J Neurochem* 155:475–493.
- 637 O'Connor J, O'Neill C (2008) A role for adenosine A1 receptors in GABA and NMDA-receptor mediated  
638 modulation of dopamine release: studies using fast cyclic voltammetry. *Sensors* 8:5516–5534.
- 639 O'Neill C, Nolan BJ, Macari A, O'Boyle KM, O'Connor JJ (2007) Adenosine A1 receptor-mediated inhibition of  
640 dopamine release from rat striatal slices is modulated by D1 dopamine receptors. *Eur J Neurosci*  
641 26:3421–3428.
- 642 Okada M, Mizuno K, Kaneko S (1996) Adenosine A1 and A2 receptors modulate extracellular dopamine levels  
643 in rat striatum. *Neurosci Lett* 212:53–56.
- 644 Pajski ML, Venton BJ (2010) Adenosine release evoked by short electrical stimulations in striatal brain slices is  
645 primarily activity dependent. *ACS Chem Neurosci* 1:775–787.
- 646 Parkinson FE, L. Damaraju V, Graham K, Y.M. Yao S, A. Baldwin S, E. Cass C, D. Young J (2011) Molecular biology  
647 of nucleoside transporters and their distributions and functions in the brain. *Curr Top Med Chem*  
648 11:948–972.
- 649 Paulsen RE, Contestabile A, Villani L, Fonnum F (1987) An In vivo model for studying function of brain tissue  
650 temporarily devoid of glial cell metabolism: the use of fluorocitrate. *J Neurochem* 48:1377–1385.
- 651 Peng L, Huang R, Yu ACH, Fung KY, Rathbone MP, Hertz L (2005) Nucleoside transporter expression and  
652 function in cultured mouse astrocytes. *Glia* 52:25–35.
- 653 Peng W, Wu Z, Song K, Zhang S, Li Y, Xu M (2020) Regulation of sleep homeostasis mediator adenosine by basal  
654 forebrain glutamatergic neurons. *Science* 369.
- 655 Perrier SP, Gleizes M, Fonta C, Nowak LG (2019) Effect of adenosine on short-term synaptic plasticity in mouse  
656 piriform cortex in vitro: adenosine acts as a high-pass filter. *Physiol Rep* 7:e13992.
- 657 Phan TA, Gray AM, Nyce JW (1997) Intrastratial adenosine A1 receptor antisense oligodeoxynucleotide blocks  
658 ethanol-induced motor incoordination. *Eur J Pharmacol* 323:R5–R7.
- 659 Preston Z, Lee K, Widdowson L, Freeman TC, Dixon AK, Richardson PJ (2009) Adenosine receptor expression  
660 and function in rat striatal cholinergic interneurons. *Br J Pharmacol* 130:886–890.
- 661 Qi G, Van Aerde K, Abel T, Feldmeyer D (2017) Adenosine differentially modulates synaptic transmission of  
662 excitatory and inhibitory microcircuits in layer 4 of rat barrel cortex. *Cereb Cortex* 27:4411–4422.
- 663 Quarta D, Borycz J, Solinas M, Patkar K, Hockemeyer J, Ciruela F, Lluís C, Franco R, Woods AS, Goldberg SR,  
664 Ferré S (2004a) Adenosine receptor-mediated modulation of dopamine release in the nucleus  
665 accumbens depends on glutamate neurotransmission and N-methyl-D-aspartate receptor stimulation. *J*  
666 *Neurochem* 91:873–880.
- 667 Quarta D, Ferré S, Solinas M, You ZB, Hockemeyer J, Popoli P, Goldberg SR (2004b) Opposite modulatory roles  
668 for adenosine A1 and A2A receptors on glutamate and dopamine release in the shell of the nucleus  
669 accumbens. Effects of chronic caffeine exposure. *J Neurochem* 88:1151–1158.

- 670 Rice ME, Cragg SJ (2004) Nicotine amplifies reward-related dopamine signals in striatum. *Nat Neurosci* 7:583–  
671 584.
- 672 Rice ME, Patel JC, Cragg SJ (2011) Dopamine release in the basal ganglia. *Neuroscience* 198:112–137.
- 673 Richardson PJ, Brown SJ (1987) ATP release from affinity-purified rat cholinergic nerve terminals. *J Neurochem*  
674 48:622–630.
- 675 Roberts BM, Doig NM, Brimblecombe KR, Lopes EF, Siddorn RE, Threlfell S, Connor-Robson N, Bengoa-  
676 Vergniory N, Pasternack N, Wade-Martins R, Magill PJ, Cragg SJ (2020) GABA uptake transporters support  
677 dopamine release in dorsal striatum with maladaptive downregulation in a parkinsonism model. *Nat*  
678 *Commun* 11:1–17.
- 679 Roberts BM, Lopes EF, Cragg SJ (2021) Axonal modulation of striatal dopamine release by local  $\gamma$ -aminobutyric  
680 acid (GABA) signalling. *Cells* 10:709.
- 681 Rose JH, Karkhanis AN, Chen R, Gioia D, Lopez MF, Becker HC, McCool BA, Jones SR (2016) Supersensitive  
682 kappa opioid receptors promotes ethanol withdrawal-related behaviors and reduce dopamine signaling  
683 in the nucleus accumbens. *Int J Neuropsychopharmacol* 19:pyv127.
- 684 Ross AE, Venton BJ (2015) Adenosine transiently modulates stimulated dopamine release in the caudate-  
685 putamen via A1 receptors. *J Neurochem* 132:51–60.
- 686 Solinas M, Ferré S, You ZB, Karcz-Kubicha M, Popoli P, Goldberg SR (2002) Caffeine induces dopamine and  
687 glutamate release in the shell of the nucleus accumbens. *J Neurosci* 22:6321–6324.
- 688 Song WJ, Tkatch T, Surmeier DJ (2000) Adenosine receptor expression and modulation of Ca<sup>2+</sup> channels in rat  
689 striatal cholinergic interneurons. *J Neurophysiol* 83:322–332.
- 690 Stouffer MA, Woods CA, Patel JC, Lee CR, Witkovsky P, Bao L, Machold RP, Jones KT, de Vaca SC, Reith MEA,  
691 Carr KD, Rice ME (2015) Insulin enhances striatal dopamine release by activating cholinergic  
692 interneurons and thereby signals reward. *Nat Commun* 6:8543.
- 693 Sulzer D, Cragg SJ, Rice ME (2016) Striatal dopamine neurotransmission: Regulation of release and uptake.  
694 *Basal Ganglia* 6:123–148.
- 695 Tanaka A, Nishida K, Okuda H, Nishiura T, Higashi Y, Fujimoto S, Nagasawa K (2011) Peroxynitrite treatment  
696 reduces adenosine uptake via the equilibrative nucleoside transporter in rat astrocytes. *Neurosci Lett*  
697 498:52–56.
- 698 Threlfell S, Lalic T, Platt NJ, Jennings K a, Deisseroth K, Cragg SJ (2012) Striatal dopamine release is triggered by  
699 synchronized activity in cholinergic interneurons. *Neuron* 75:58–64.
- 700 Toda S, Alguacil LF, Kalivas PW (2003) Repeated cocaine administration changes the function and subcellular  
701 distribution of adenosine A1 receptor in the rat nucleus accumbens. *J Neurochem* 87:1478–1484.
- 702 Wang Y, Toyoshima O, Kunitatsu J, Yamada H, Matsumoto M (2021) Tonic firing mode of midbrain dopamine  
703 neurons continuously tracks reward values changing moment-by-moment. *eLife* 10:e63166.

704 Wong AYC, Billups B, Johnston J, Evans RJ, Forsythe ID (2006) Endogenous activation of adenosine A1  
705 receptors, but not P2X receptors, during high-frequency synaptic transmission at the calyx of held. *J*  
706 *Neurophysiol* 95:3336–3342.

707 Wu J, Lee MR, Choi S, Kim T, Choi D-S (2010) ENT1 regulates ethanol-sensitive EAAT2 expression and function  
708 in astrocytes. *Alcohol Clin Exp Res* 34:1110–1117.

709 Wu Z, Cui Y, Wang H, Song K, Yuan Z, Dong A, Wu H, Wan Y, Pan S, Peng W, Jing M, Xu M, Luo M, Li Y (2020) A  
710 GRAB sensor reveals activity-dependent non-vesicular somatodendritic adenosine release.  
711 *bioRxiv:2020.05.04.075564*.

712 Yang SC, Chiu TH, Yang HW, Min MY (2007) Presynaptic adenosine A1 receptors modulate excitatory synaptic  
713 transmission in the posterior piriform cortex in rats. *Brain Res* 1156:67–79.

714 Yorgason JT, Ferris MJ, Steffensen SC, Jones SR (2014) Frequency-dependent effects of ethanol on dopamine  
715 release in the nucleus accumbens. *Alcohol Clin Exp Res* 38:438–447.

716 Yorgason JT, Rose JH, McIntosh JM, Ferris MJ, Jones SR (2015) Greater ethanol inhibition of presynaptic  
717 dopamine release in C57BL/6J than DBA/2J mice: Role of nicotinic acetylcholine receptors. *Neuroscience*  
718 284:854–864.

719 Young JD, Yao SYM, Sun L, Cass CE, Baldwin SA (2008) Human equilibrative nucleoside transporter (ENT) family  
720 of nucleoside and nucleobase transporter proteins. *Xenobiotica* 38:995–1021.

721 Zhang H, Sulzer D (2003) Glutamate spillover in the striatum depresses dopaminergic transmission by  
722 activating group I metabotropic glutamate receptors. *J Neurosci* 23:10585–10592.

723 Zhang H, Sulzer D (2004) Frequency-dependent modulation of dopamine release by nicotine. *Nat Neurosci*  
724 7:581–582.

725

726

727

728

729

730

731

732

733

734

735

736  
737  
738  
739  
740  
741  
742  
743  
744  
745

**Table 1. Comparison of effects of adenosine A<sub>1</sub> receptor agonists and antagonists on evoked mean peak [DA]<sub>o</sub> between sexes**

| Sex                                                                             | Mean [DA] <sub>o</sub> (% pre-drug) | SEM  | n | unpaired t test              |
|---------------------------------------------------------------------------------|-------------------------------------|------|---|------------------------------|
| Figure 1B: A <sub>1</sub> agonist (CPA), electrically-evoked DA release         |                                     |      |   |                              |
| Male                                                                            | 39.6                                | 6.8  | 3 | $t_{(4)} = 0.467, p = 0.665$ |
| Female                                                                          | 43.2                                | 3.9  | 3 |                              |
| Figure 1G: A <sub>1</sub> agonist (CPA), optogenetically-evoked DA release      |                                     |      |   |                              |
| Male                                                                            | 59.4                                | 2.9  | 4 | $t_{(6)} = 1.141, p = 0.297$ |
| Female                                                                          | 53.4                                | 4.4  | 4 |                              |
| Figure 3A: A <sub>1</sub> antagonist (CPT), electrically-evoked DA release      |                                     |      |   |                              |
| Male                                                                            | 140.8                               | 7.8  | 4 | $t_{(5)} = 0.181, p = 0.864$ |
| Female                                                                          | 142.6                               | 5.4  | 3 |                              |
| Figure 3C: A <sub>1</sub> antagonist (Caffeine), electrically-evoked DA release |                                     |      |   |                              |
| Male                                                                            | 117.4                               | 8.0  | 3 | $t_{(4)} = 0.304, p = 0.777$ |
| Female                                                                          | 114.9                               | 2.2  | 3 |                              |
| Figure 3E: A <sub>1</sub> antagonist (CPT), optogenetically-evoked DA release   |                                     |      |   |                              |
| Male                                                                            | 126.6                               | 16.7 | 3 | $t_{(6)} = 0.258, p = 0.805$ |
| Female                                                                          | 130.0                               | 3.8  | 5 |                              |

746  
747  
748  
749  
750  
751  
752  
753

754  
755  
756  
757

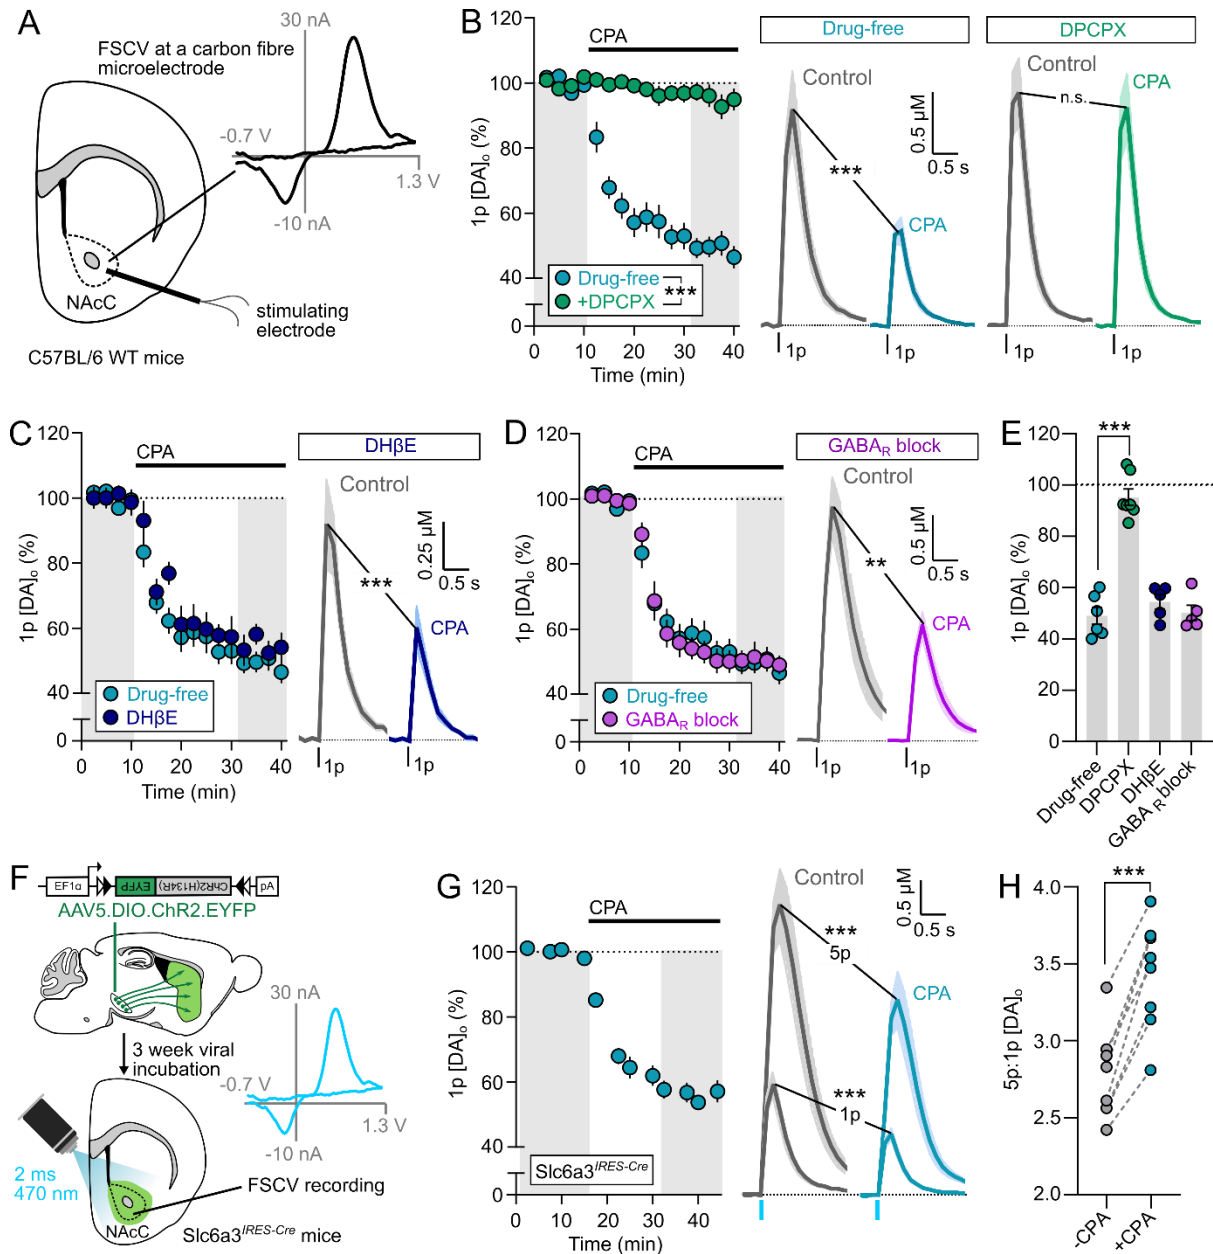

758  
759

760 **Figure 1. Adenosine  $A_1R$  agonists inhibit DA release in NAcC.** **A**, Experimental setup for FSCV for DA detection in wild-type  
761 mouse NAcC in acute slices. Inset, typical evoked DA voltammogram. **B-D**, Left, Summary of mean peak  $[DA]_o$  evoked by a  
762 single electrical pulse (1p) before and after application of  $A_1R$  agonist CPA (15  $\mu M$ ) normalised to pre-drug baseline (dotted  
763 line). Shaded areas represent time points used to obtain data on right, mean  $[DA]_o$  transients in either drug-free ACSF (blue  
764  $n = 6$  experiments/4 mice), or in the presence of  $A_1R$  antagonist DPCPX (2  $\mu M$ ) (B, green,  $n = 8$  experiments/5 mice), or  
765 nAChR antagonist DH $\beta$ E (1  $\mu M$ ) (C, dark blue,  $n = 5$  experiments/4 mice), or GABA $_A$  and GABA $_B$  antagonists (+)-bicuculline  
766 (10  $\mu M$ ) and CGP 55845 (4  $\mu M$ ) (D, purple,  $n = 5$  experiments/4 mice). Control data in (C) and (D) are from (B). **E**, Mean  
767 peak  $[DA]_o$  following application of CPA (15  $\mu M$ ) (as a % of pre-drug baseline, data summarised from (B-D)). **F**,  
768 Viral injection into midbrain of  $Slc6a3^{IRES-Cre}$  mice for expression of Chr2-eYFP in DA axons for optogenetic-evoked DA

769 release. **G**, As in (B) but  $[DA]_o$  evoked optogenetically by single light pulses (1p) or five pluses of light (5p) at 25 Hz ( $n = 8$   
 770 experiments/5 mice). **H**, Ratio of peak  $[DA]_o$  evoked by 5p:1p at 25 Hz before (grey) and after (blue) application of CPA (15  
 771  $\mu\text{M}$ ). Statistics: \*\*\* $p < 0.001$ , paired t tests (B,C,D,G,H), unpaired t tests (E) and two-way repeated measures ANOVA (B,C,D).  
 772 Error bars indicate SEM.

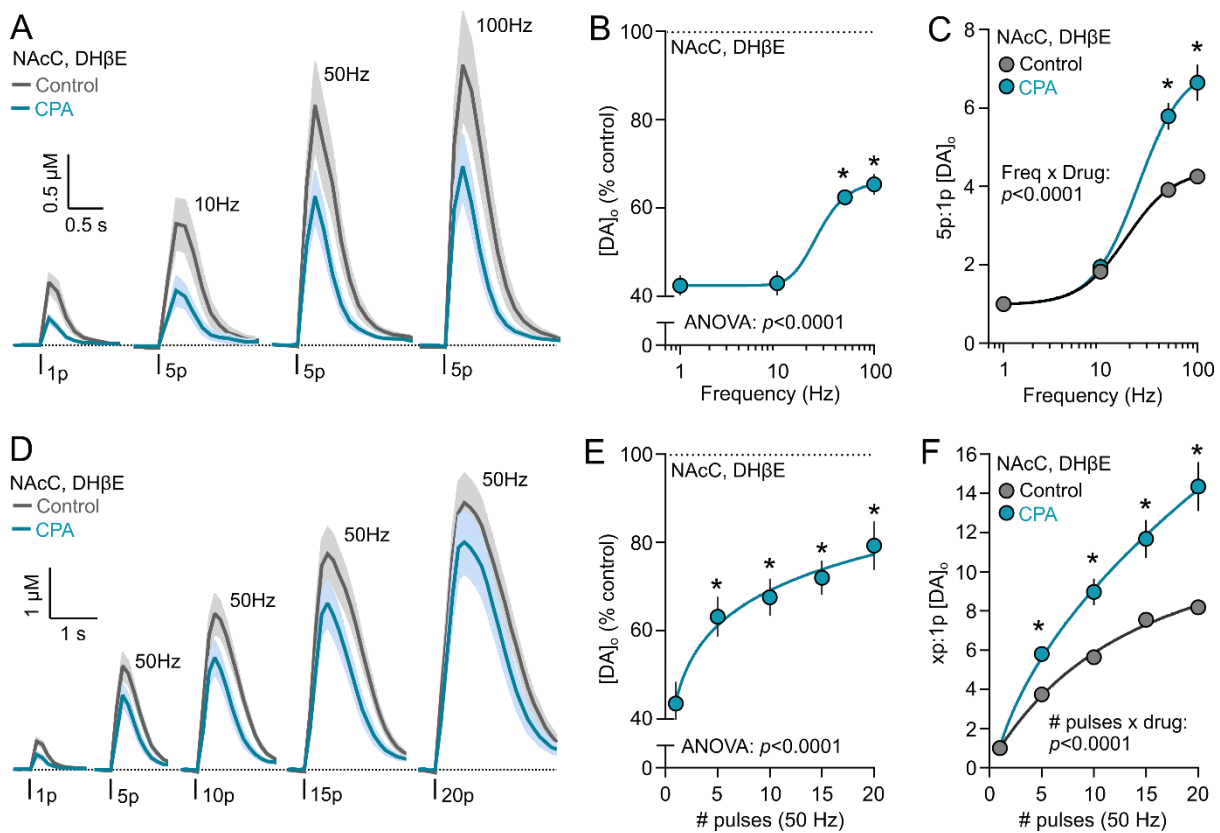

773

774

775 **Figure 2. Adenosine A<sub>1</sub>R agonists modify the frequency- and activity-sensitivity of DA release in NAcC.** **A**, Mean  $[DA]_o$   
 776 transients evoked by 1 or 5 electrical pulses in control conditions (grey) or in A<sub>1</sub>R agonist CPA (15  $\mu\text{M}$ ) (blue) in NAcC ( $n = 7$   
 777 experiments/5 mice). **B**, Mean peak  $[DA]_o$  from (A) normalised to control conditions versus stimulation frequency. **C**, Mean  
 778 peak  $[DA]_o$  from (A) normalised to 1p in each condition versus stimulation frequency. **D**, Mean  $[DA]_o$  transient evoked by 1-  
 779 20 pulses (50 Hz) of electrical trains in control conditions (grey) or in A<sub>1</sub>R agonist CPA (15  $\mu\text{M}$ ) (blue) in NAcC ( $n = 7$   
 780 experiments/5 mice). **E**, Mean peak  $[DA]_o$  from (D) normalised to control conditions versus pulse number. **F**, Mean peak  
 781  $[DA]_o$  from (D) normalised to 1p in each condition versus number of pulses. Statistics: \* $p < 0.001$ , one-way repeated  
 782 measures ANOVA with Sidak's multiple comparisons to 1p (B,E), two-way repeated measures ANOVA with Sidak's multiple  
 783 comparisons (C,F). Sigmoidal non-linear curve fits. Error bars indicate SEM. DH $\beta$ E (1  $\mu\text{M}$ ) present throughout.

784

785

786

787

788

789

790

791

792



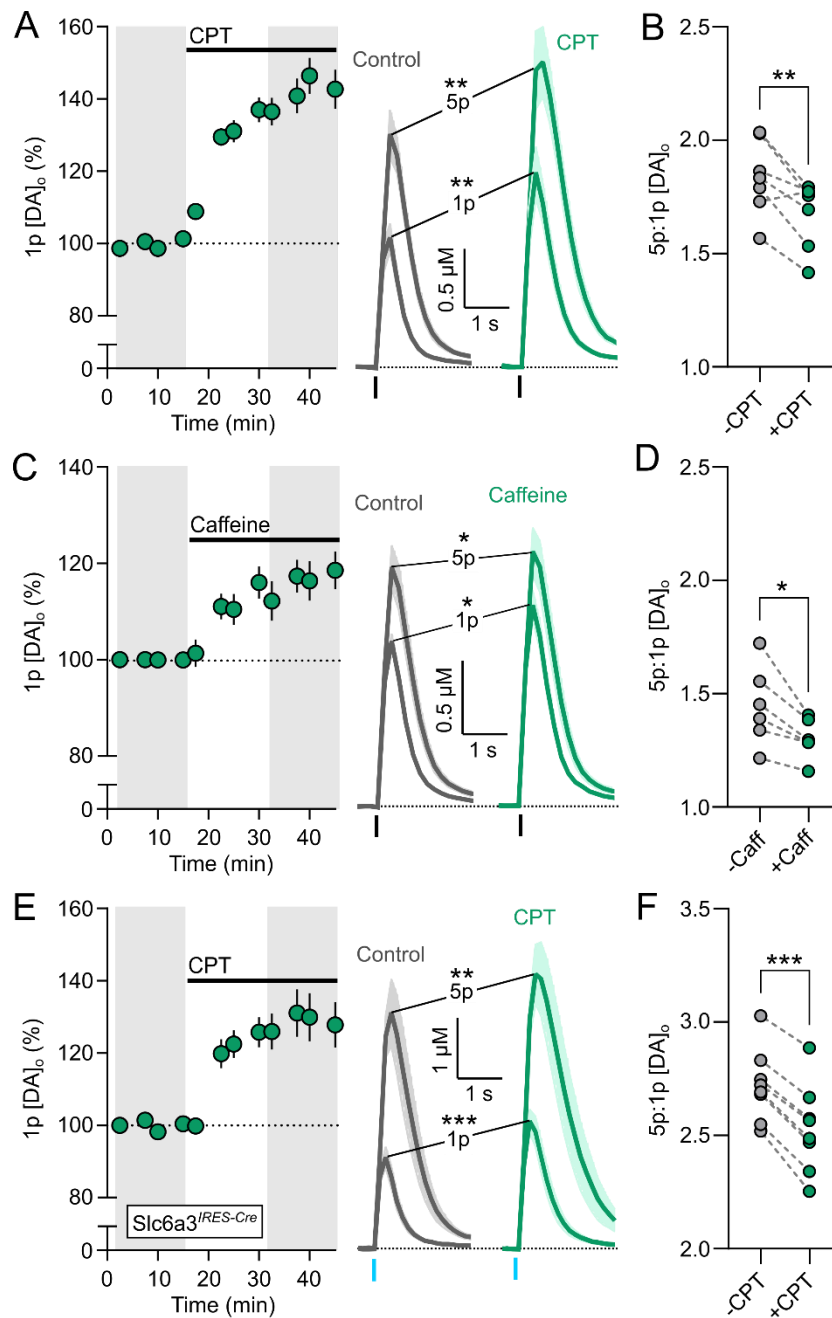

793

794

795 **Figure 3. Adenosine  $A_1R$  antagonists enhance DA release and correspondingly reduce the activity-sensitivity of DA**  
 796 **release in NAcC.** **A**, Left, summary of mean peak  $[DA]_o$  before (grey) and after application of  $A_1R$  antagonist CPT (10  $\mu M$ )  
 797 (green) normalised to pre-drug baseline (dotted line) and right, corresponding mean  $[DA]_o$  transients evoked by a single  
 798 electrical pulse (1p) and five pulses (5p) at 50 Hz in NAcC ( $n = 7$  experiments/4 mice). Shaded areas are used to obtain  
 799 illustrated transients of  $[DA]_o$  and for statistical comparisons. **B**, Ratio of peak  $[DA]_o$  evoked by 5p:1p at 50 Hz before (grey)  
 800 and after (blue) application of CPT (10  $\mu M$ ). Data summarised from (A). **C-D**, As in (A-B) but before (grey) and after  
 801 application caffeine (20  $\mu M$ ) (green) ( $n = 6$  experiments/4 mice). **E-F**, As in (A-B) but  $[DA]_o$  evoked optogenetically by single  
 802 light pulses (1p) or five pulses (5p) of light at 25 Hz in  $Slc6a3^{IRES-Cre}$  mice ( $n = 8$  experiments/5 mice). Statistics: \* $p < 0.05$ ,  
 803 \*\* $p < 0.01$ , \*\*\* $p < 0.001$ , Paired  $t$  tests. Error bars indicate SEM.

804

805

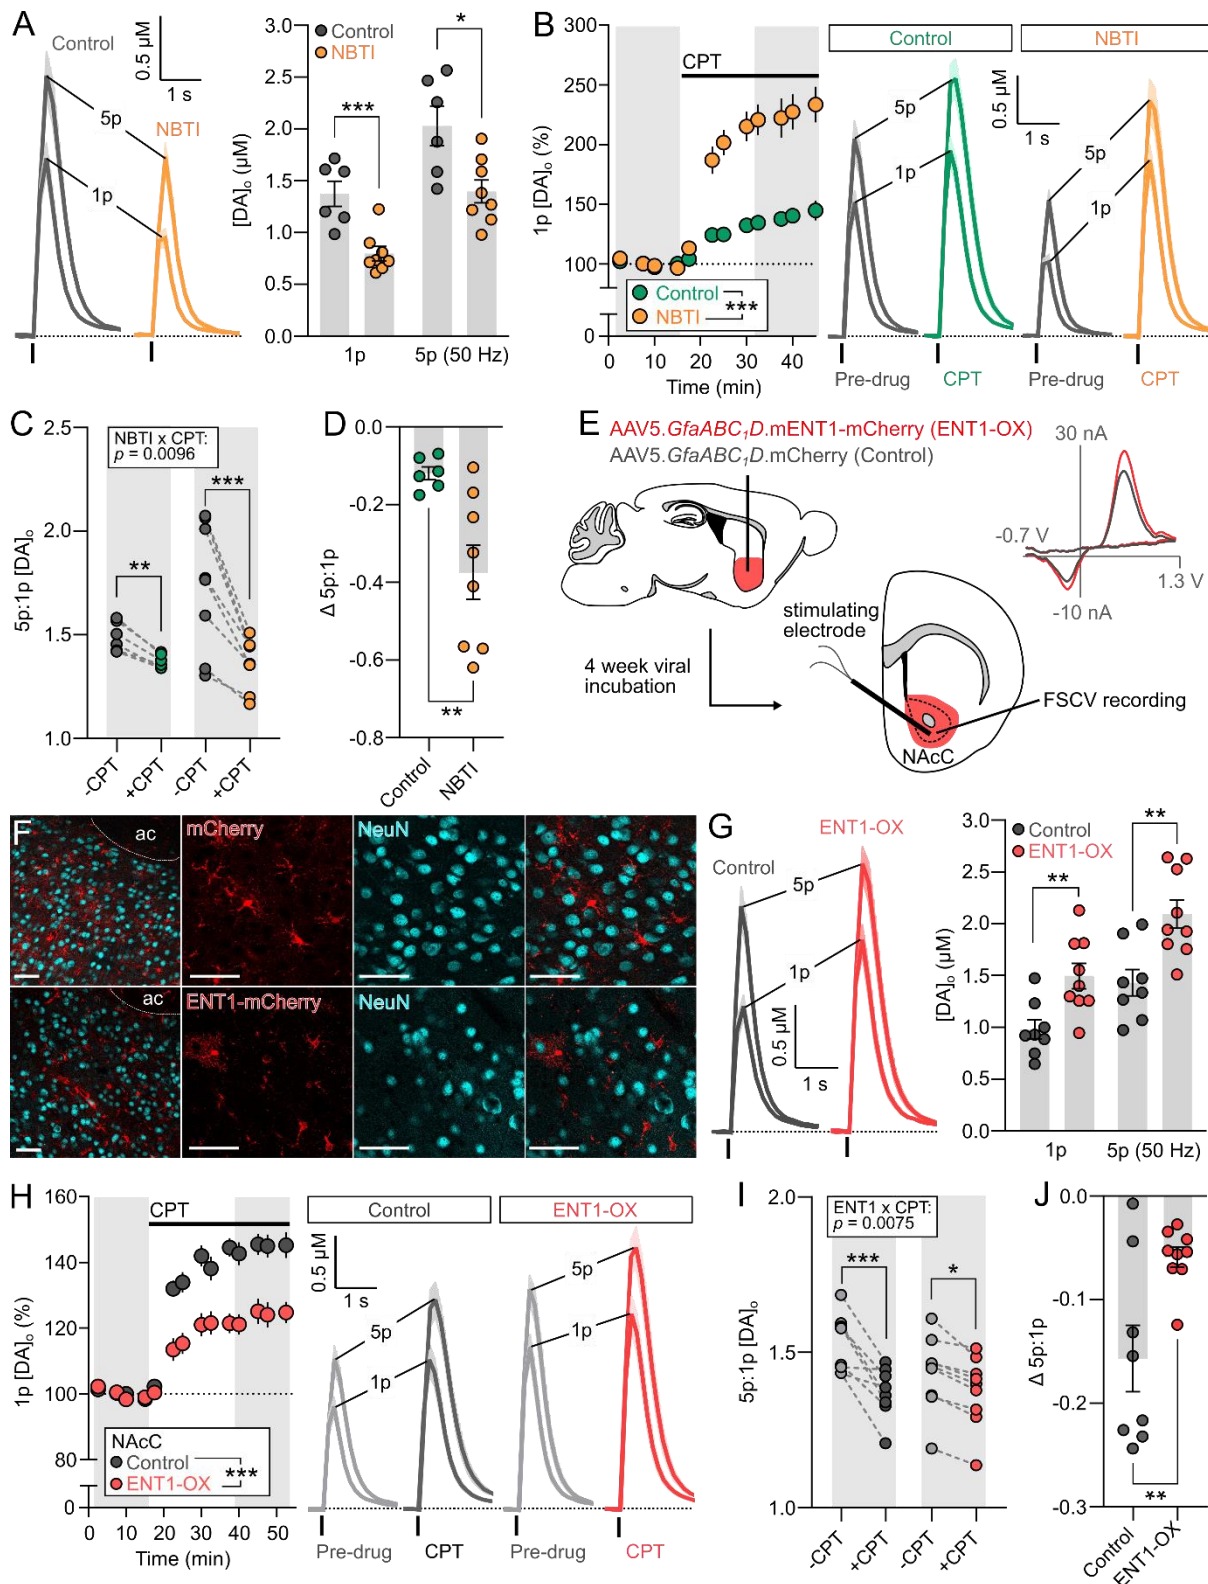

806

807 **Figure 4. Adenosine uptake by ENT1 on striatal astrocytes regulates tonic A<sub>1</sub>R-mediated inhibition of DA release.** **A,**  
 808 Mean [DA]<sub>o</sub> transients (left) and corresponding mean peak [DA]<sub>o</sub> (right) evoked by a single electrical pulse (1p) or five  
 809 pulses (5p) at 50 Hz in NAcC in the absence (grey; n = 6 experiments/5 mice) or presence of ENT1 inhibitor NBTI (10 μM)  
 810 (orange; n = 8 experiments/5 mice). **B,** Summary of mean peak [DA]<sub>o</sub> before (grey) and after application of A<sub>1</sub>R antagonist  
 811 CPT (10 μM) normalised to pre-drug baseline (dotted line) (left) and right, corresponding mean [DA]<sub>o</sub> transients evoked by  
 812 a single electrical pulse (1p) and five pulses (5p) at 50 Hz in NAcC in the absence (green, n = 6 experiments/5 mice) or  
 813 presence of ENT1 inhibitor NBTI (10 μM) (orange; n = 8 experiments/5 mice). **C-D,** Ratio of peak [DA]<sub>o</sub> evoked by 5p:1p at  
 814 50 Hz (C) and Δ 5p:1p (D) before (grey) and after application of CPT (10 μM) in absence (left, green) or presence of ENT1

815 inhibitor NBTI (10  $\mu$ M) (right, orange). Data summarised from (B). **E**, Delivery to NAcC of viral fluorescence-tagged ENT1  
816 driven by an astrocytic promoter to test impact of increased astrocyte-specific expression of ENT1 on DA release detected  
817 locally in NAcC. **F**, Immunofluorescence for mCherry (top, red), mCherry-tagged ENT1 (bottom, red) and neuronal marker  
818 NeuN (cyan) in NAcC. Scale bars: 40  $\mu$ m. ac, anterior commissure. **G**, Mean  $[DA]_o$  transients (left) and corresponding mean  
819 peak  $[DA]_o$  (right) evoked by a single electrical pulse (1p) or five pulses (5p) at 50 Hz in NAcC in slices overexpressing ENT1  
820 (ENT1-OX; red;  $n = 9$  experiments/4 mice) or expressing control fluorophore mCherry (dark grey;  $n = 8$  experiments/4 mice)  
821 under an astrocyte-specific promoter. **H**, Summary of mean peak  $[DA]_o$  before (grey) and after application of  $A_1R$   
822 antagonist CPT (10  $\mu$ M) normalised to pre-drug baseline (dotted line) (left) and right, corresponding mean  $[DA]_o$  transients  
823 evoked by a single electrical pulse (1p) and five pulses (5p) at 50 Hz in NAcC in slices overexpressing ENT1 (ENT1-OX; red;  $n$   
824 = 9 experiments/4 mice) or expressing control fluorophore mCherry (dark grey;  $n = 8$  experiments/4 mice). **I-J**, Ratio of  
825 peak  $[DA]_o$  evoked by 5p:1p at 50 Hz (I) and  $\Delta$  5p:1p (J) before (light grey) and after application of CPT (10  $\mu$ M) in slices  
826 overexpressing ENT1 (right, red) or expressing control fluorophore mCherry (left, dark grey). Data summarised from (H).  
827 Statistics:  $p < 0.05$ ,  $**p < 0.01$ ,  $***p < 0.001$ , unpaired  $t$  test (A,D,G,J), two-way repeated measures ANOVA (B,C,H,I) with Sidak  
828 multiple comparisons (C,I). Error bars indicate SEM.

829

830

831

832

833

834

835

836

837

838

839

840

841

842

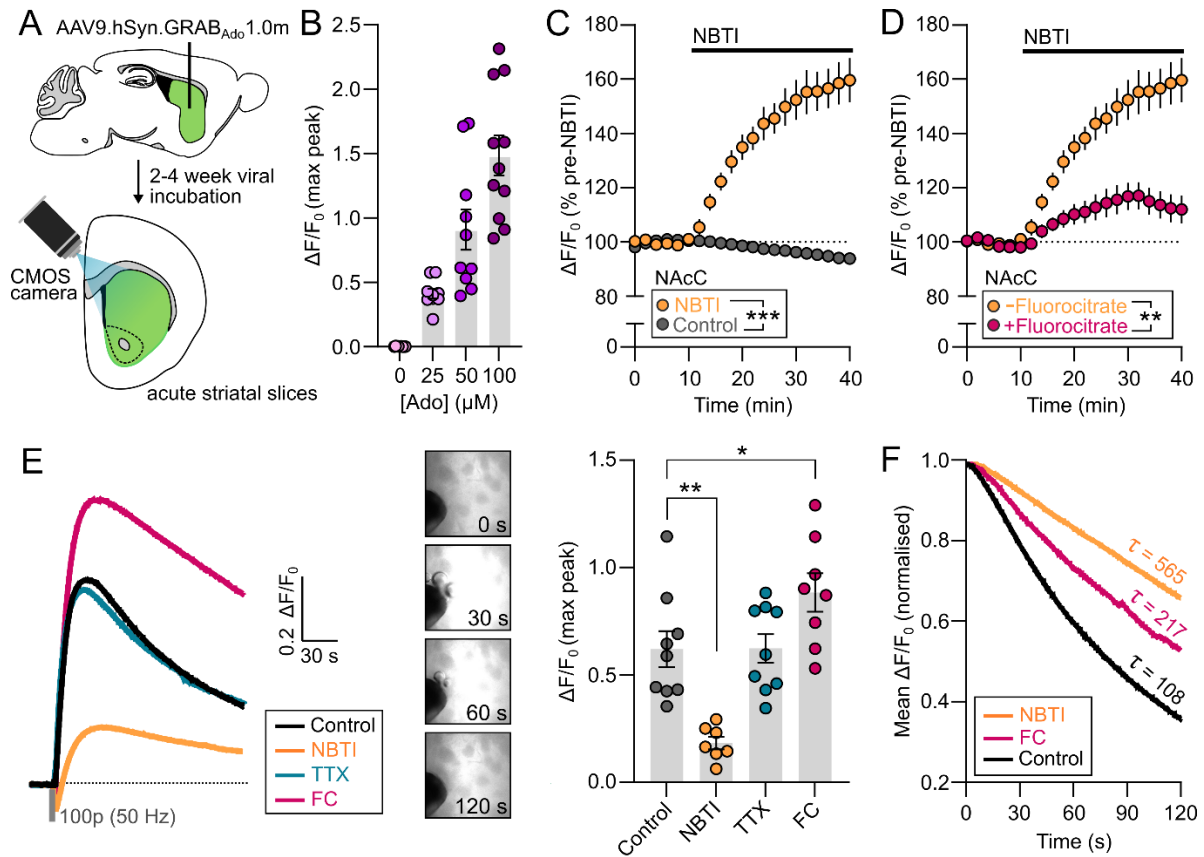

843

844

845 **Figure 5. Striatal adenosine tone is regulated by ENT1 activity on striatal astrocytes.** **A**, Viral delivery of GRAB-Ado to  
 846 striatum for imaging extracellular adenosine levels *ex vivo* in acute striatal slices. **B**, Peak  $\Delta F/F_0$  in response to increasing  
 847 concentrations of exogenously applied adenosine (0 – 100  $\mu\text{M}$ ) ( $n = 9 - 11$  slices/4 – 6 mice). **C**, Non-stimulated  $\Delta F/F_0$   
 848 GRAB<sub>Ado</sub> signal in NAcC normalised to before drug application (dotted line) in control conditions (dark grey,  $n = 10$   
 849 experiments/5 mice) or before and after application of NBTI (10  $\mu\text{M}$ ) (orange,  $n = 10$  experiments/5 mice). **D**, As in (C) but  
 850 in the presence of gliotoxin fluorocitrate (100  $\mu\text{M}$ ) (pink,  $n = 6$  experiments/ 4 mice). **E**, Mean transients (left) and mean  
 851 peak (right)  $\Delta F/F_0$  GRAB<sub>Ado</sub> signal evoked by 100 electrical pulses (50 Hz) in drug-free control conditions ( $n = 9$  slices / 5  
 852 mice) or the presence of NBTI (10  $\mu\text{M}$ ) (orange;  $n = 7$  experiments/5 mice), TTX (1  $\mu\text{M}$ ) (blue;  $n = 9$  experiments/5 mice) or  
 853 fluorocitrate (100  $\mu\text{M}$ ) (pink;  $n = 8$  experiments/5 mice). **F**, Mean  $\Delta F/F_0$  decay phase normalised to peak from (E). Statistics:  
 854 \* $p < 0.05$ , \*\* $p < 0.01$ , \*\*\* $p < 0.001$ , two-way repeated measures ANOVA (C,D), and one-way ANOVA with Sidak multiple  
 855 comparisons (E). Nonlinear regression with extra-sum-of-squares F test;  $\tau$  = decay time constant (F). Error bars indicate  
 856 SEM.

857

858

859

860

861

862

863

864

865

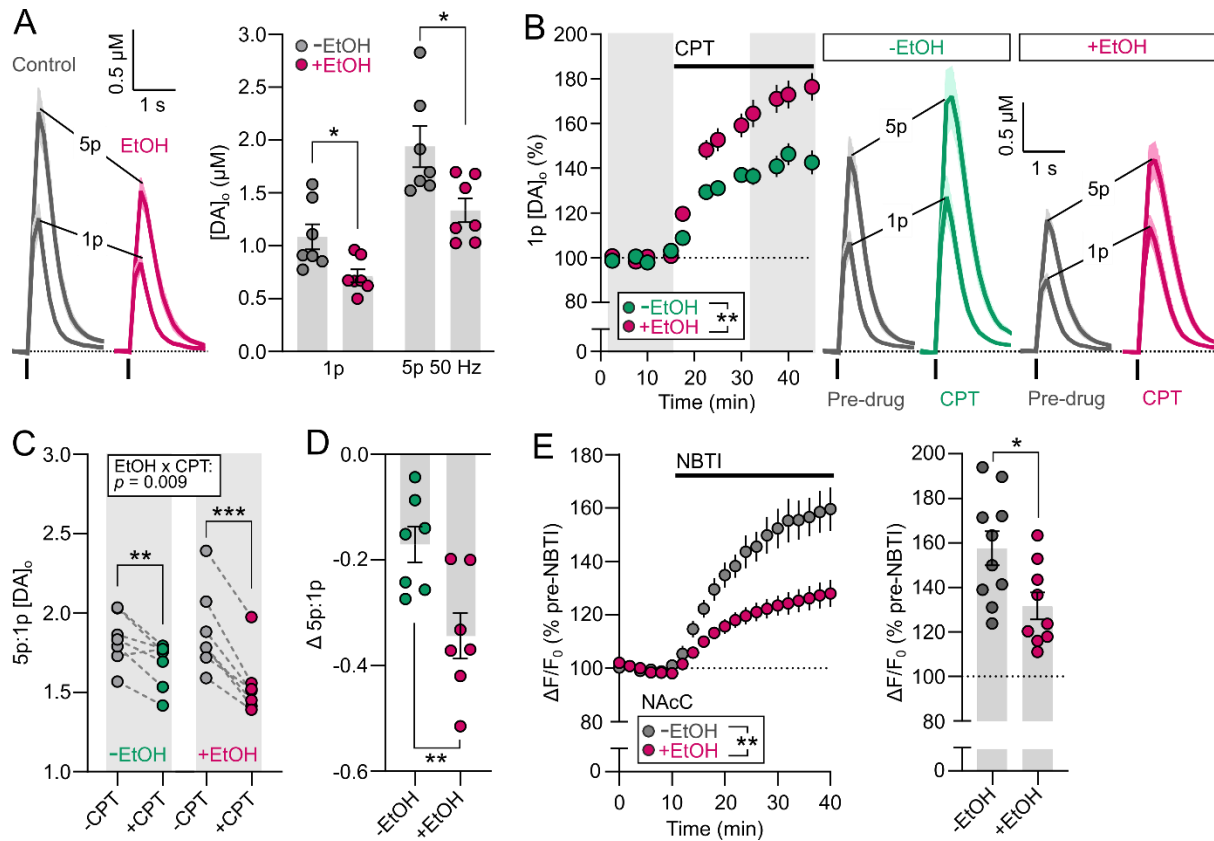

866

867

868 **Figure 6. EtOH enhances tonic adenosine A<sub>1</sub>R-mediated inhibition of DA release.** **A**, Mean [DA]<sub>o</sub> transients (left) and  
 869 corresponding mean peak [DA]<sub>o</sub> (right) evoked by a single electrical pulse (1p) or five pulses (5p) at 50 Hz in NAcC in the  
 870 absence (grey; *n* = 7 experiments/4 mice) or presence of 50 mM EtOH (pink; *n* = 7 experiments/4 mice). **B**, Summary of  
 871 mean peak [DA]<sub>o</sub> before (grey) and after application of A<sub>1</sub>R antagonist CPT (10 μM) normalised to pre-drug baseline (dotted  
 872 line) (left) and right, corresponding mean [DA]<sub>o</sub> transients evoked by a single electrical pulse (1p) and five pulses (5p)  
 873 at 50 Hz in NAcC in the absence (green, *n* = 7 experiments/4 mice) or presence of 50 mM EtOH (pink; *n* = 7 experiments/4 mice).  
 874 **C-D**, Ratio of peak [DA]<sub>o</sub> evoked by 5p:1p at 50 Hz (**C**) and Δ 5p/1p (**D**) before (grey) and after application of CPT (10 μM) in  
 875 absence (left, green) or presence of 50 mM EtOH (right, pink). Data summarised from (**B**). **E**, Summary (left) and mean peak  
 876 (right) of unstimulated ΔF/F<sub>o</sub> GRAB-Ado signal in NAcC normalised to pre-drug baseline (dotted line) before and after  
 877 application of ENT1 inhibitor NBTI (10 μM) in the absence (grey; *n* = 10 experiments/5 mice) or presence of 50 mM EtOH  
 878 (pink; *n* = 9 experiments/5 mice). Statistics: *p* < 0.05, \*\**p* < 0.01, \*\*\**p* < 0.001, unpaired *t* test (**A**,**D**), two-way repeated  
 879 measures ANOVA (**B**,**C**,**E**) with Sidak multiple comparisons (**C**). Error bars indicate SEM.

880

881

882

883

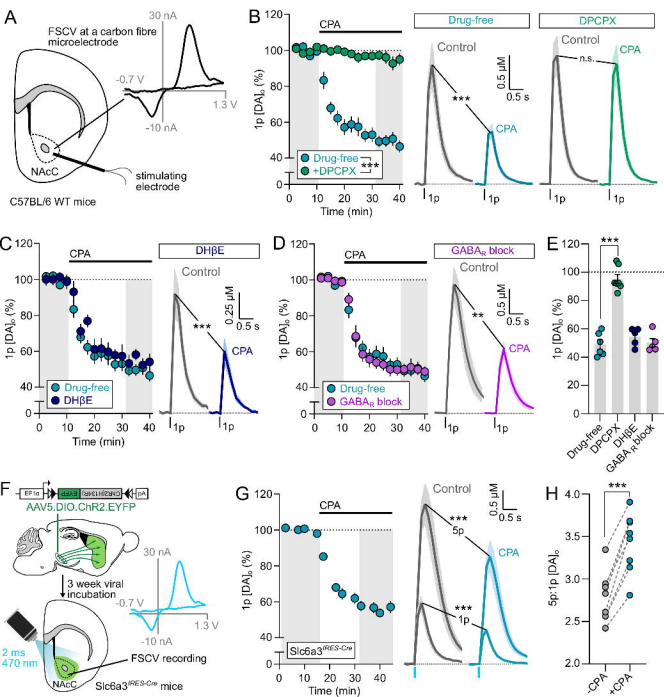

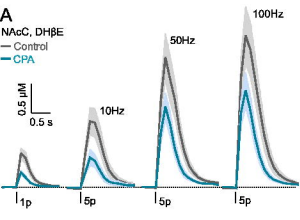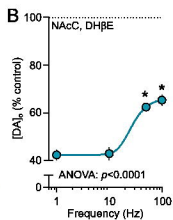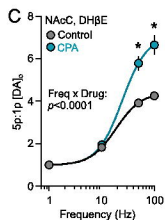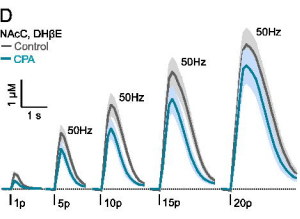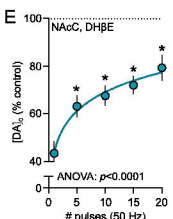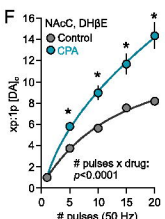

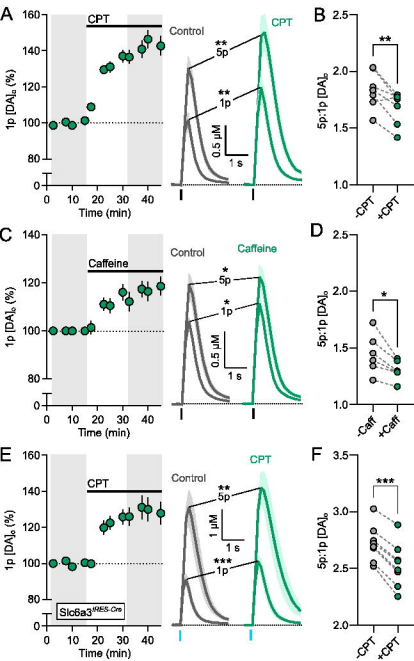



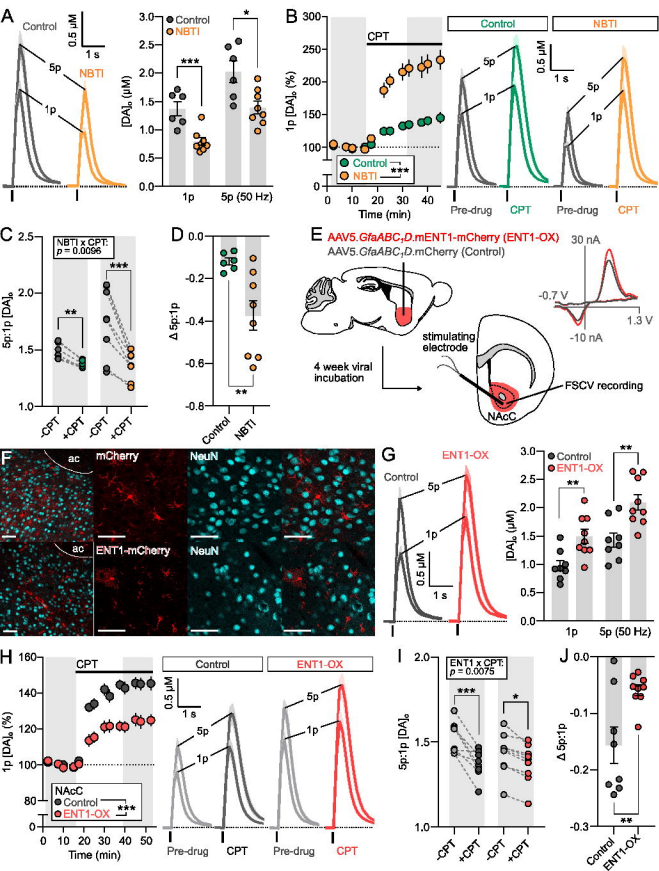

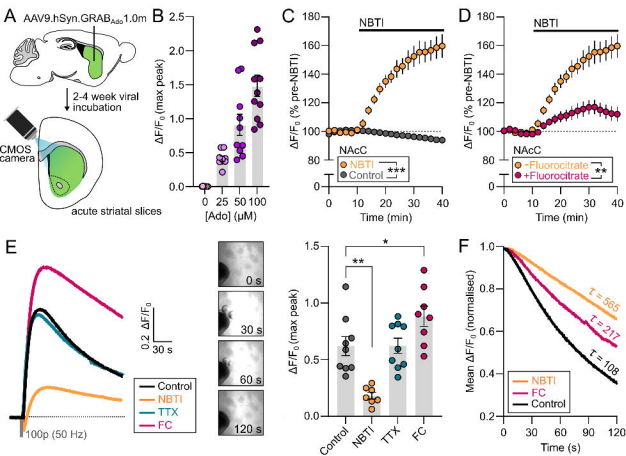

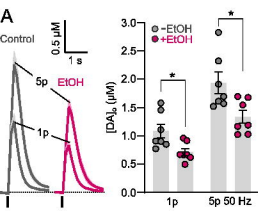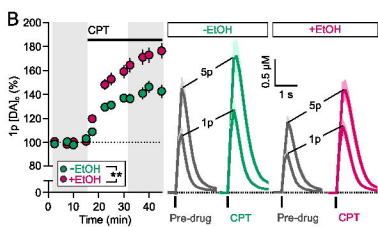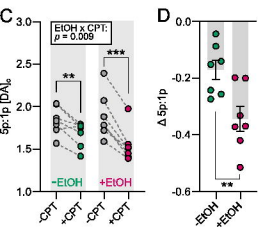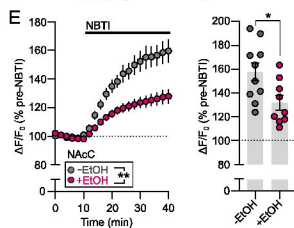

Source: http://biorxiv.org/content/10.1101/2021.11.27.470186v1.full.pdf
